# Supplementary material
Source: PubMed Central journal article supplement (PMC9945909)
Supplement: NIHMS1867704-supplement-Appendix.pdf [file NIHMS1867704-supplement-Appendix.pdf]

Healthcare Rationing in Public Insurance Programs:  
Evidence from Medicaid

Tim Layton Nicole Maestas Daniel Prinz Boris Vabson

Online Appendix

## A Additional Figures and Tables

Appendix Figure A1: Texas Counties

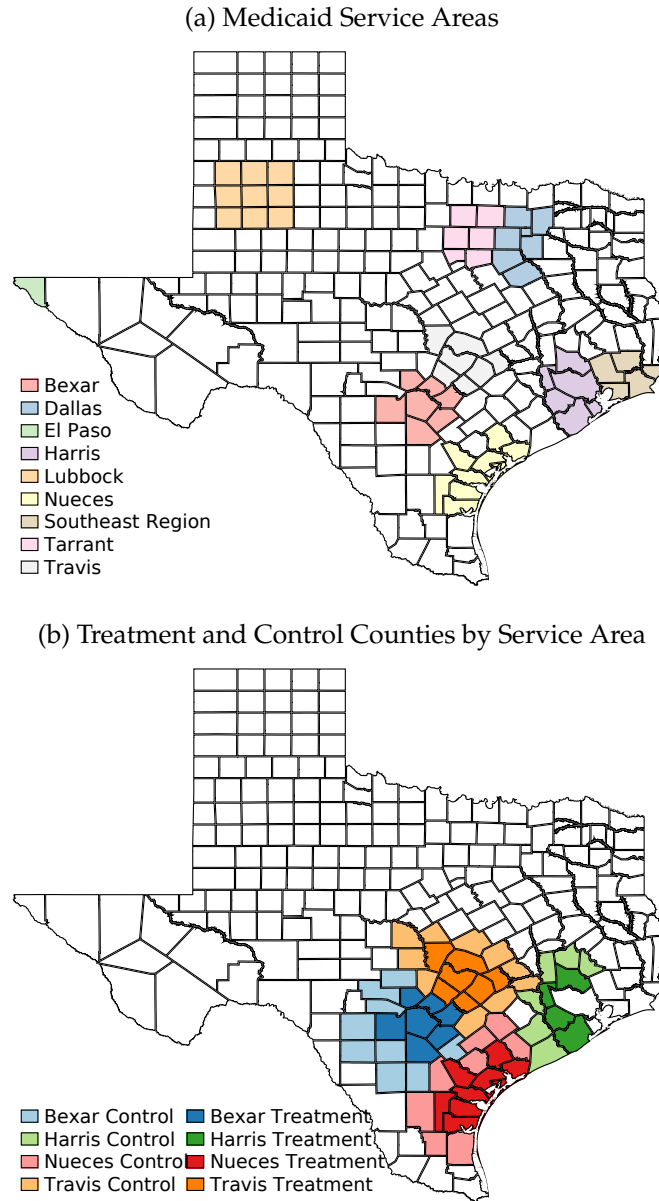

**Note:** Figure shows Medicaid service areas and the treatment and control counties we define based on these service areas. Panel (a) shows all ten of the Medicaid service areas designated by the Texas Health and Human Services Commission in April 2004. Nine service areas are marked by colors, while the 10th service area comprises much of the state and is shown in white. Panel (b) shows treatment and control counties by service area. For more details, see Section 4.

## Appendix Figure A2: Composition

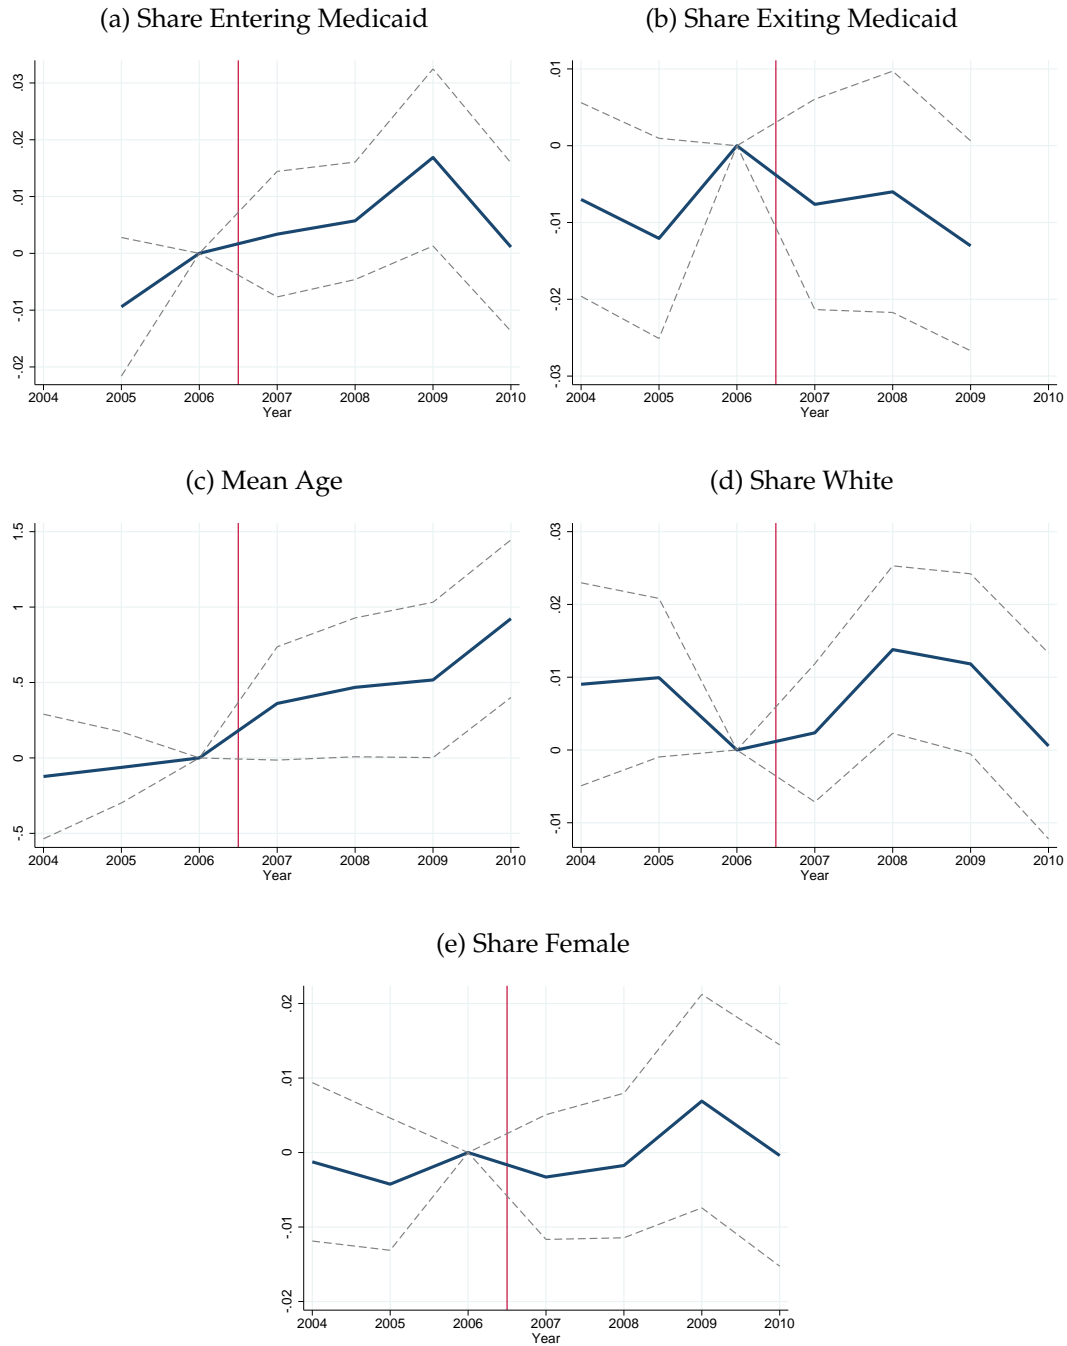

**Note:** Figure shows the impact of Medicaid managed care on sample composition measures, including Medicaid entry and exit, mean age, share white, and share female. These coefficients are from estimating the event study difference-in-differences specification in Equation (1). For more details, see Section 4. ( $N = 168,658$  beneficiary-years.)

Appendix Figure A3: Heterogeneity by Age Health Status (Quartile of Pre-Period Spending)

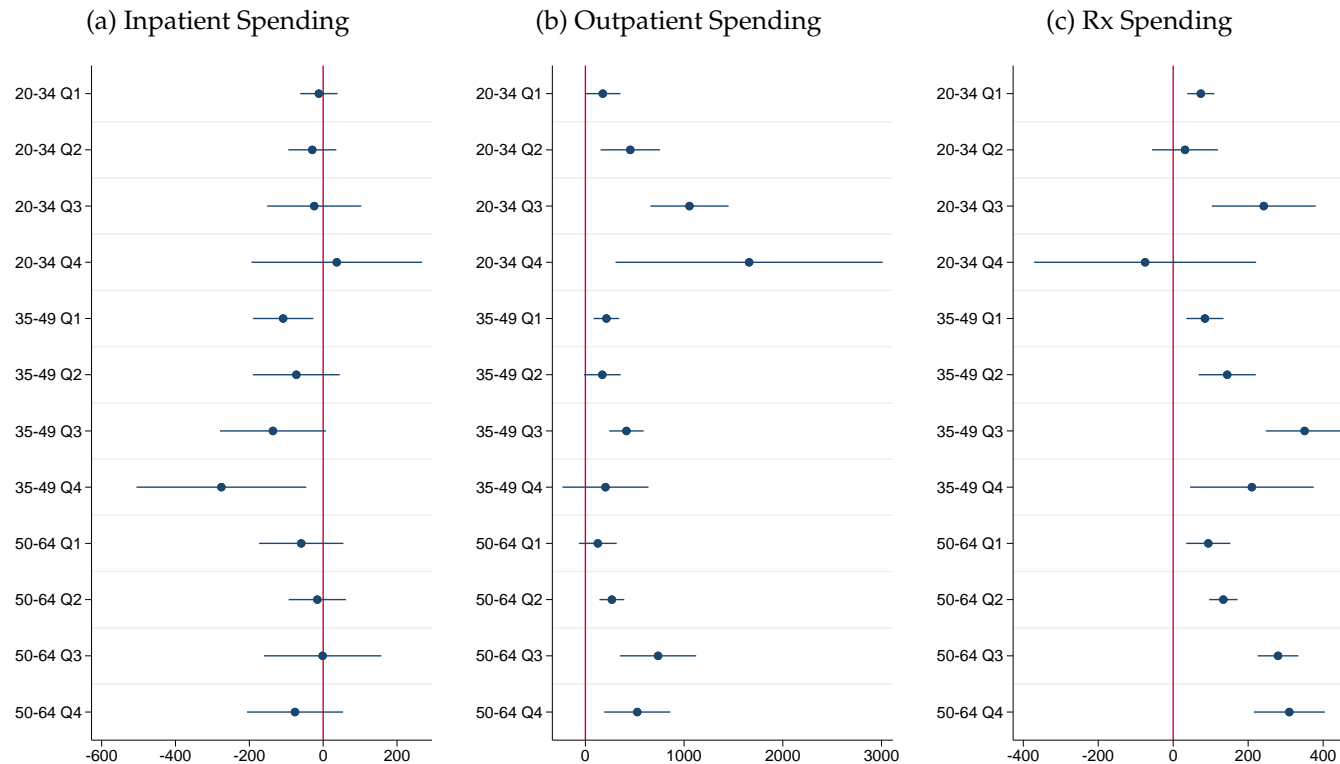

**Note:** Figure shows the impact of Medicaid managed care on inpatient spending, outpatient spending, and prescription drug spending by age and health status. Health status is measured as quartile of average spending during the pre-period, limiting our sample to beneficiaries for whom this measure can be generated. These coefficients are from estimating our instrumental variable specification separately for each age (20-34, 35-49, 50-64) by quartile of pre-period spending group. For more details, see Section 4. ( $N = 478,938$  beneficiary-quarters.)

## Appendix Figure A4: Medicaid Spending

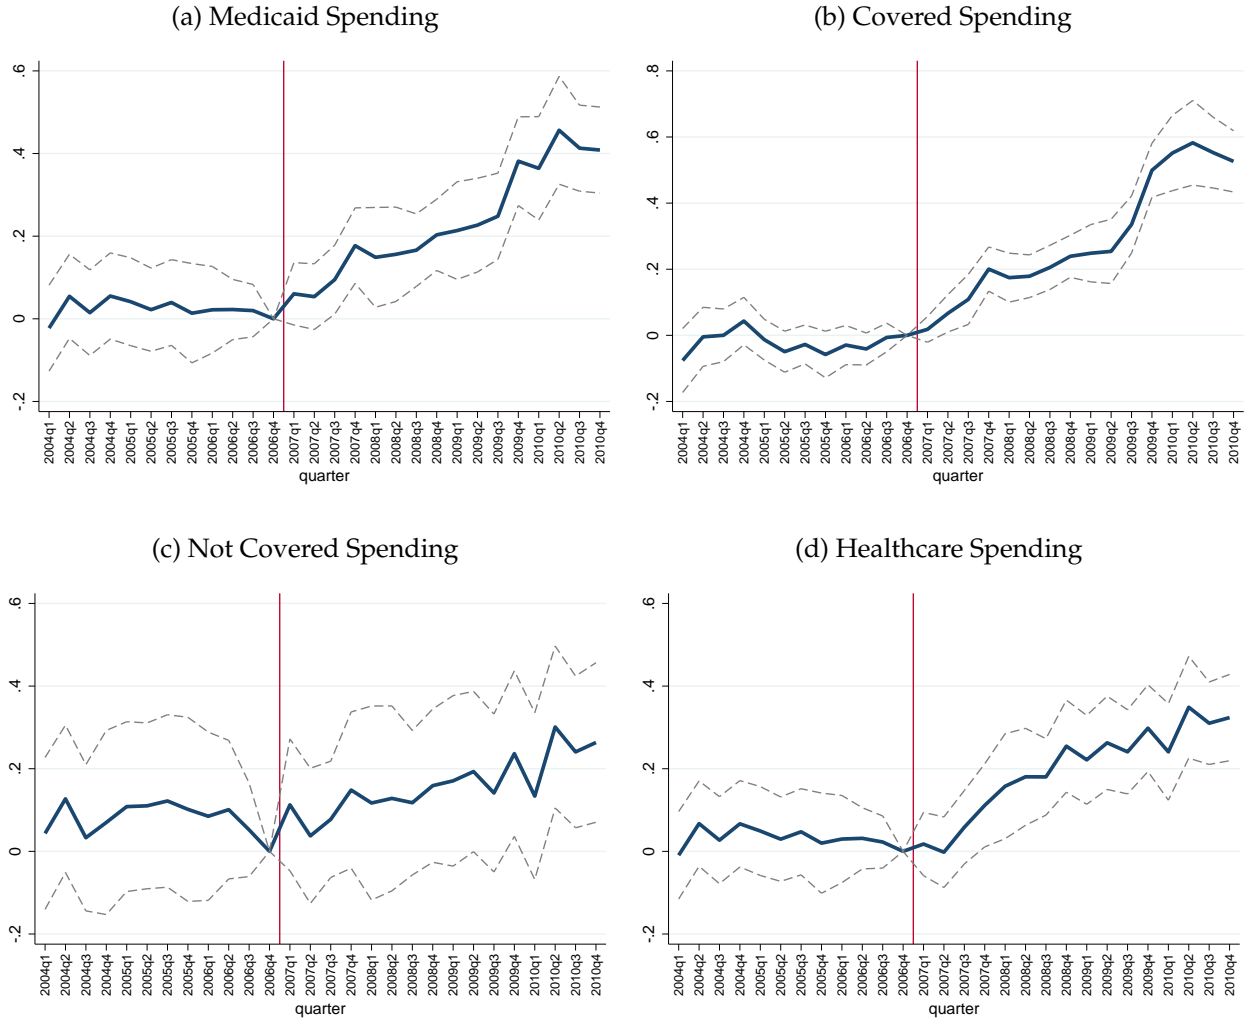

**Note:** Figure shows control-treatment differences in Medicaid spending outcomes in percent terms relative to the treatment mean in the pre-period. These coefficients are from estimating the event study difference-in-differences specification in Equation (1), including individual fixed effects. For more details, see Section 4. ( $N = 643,751$  beneficiary-quarters.)

Appendix Figure A5: Provider Overlap

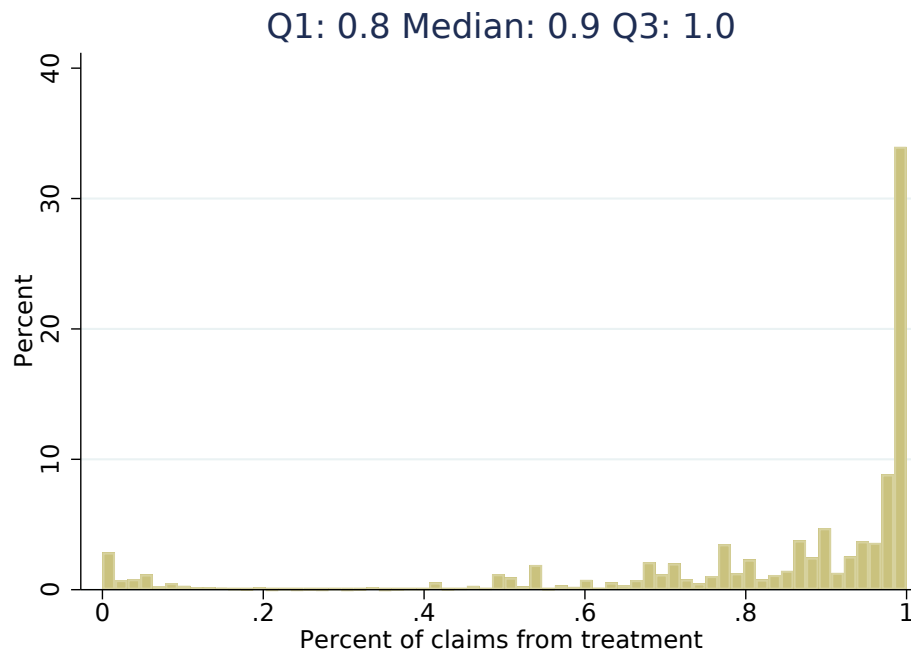

**Note:** Figure shows the 2004 distribution of the percent of claims at a provider that come from patients who live in treatment counties, weighted by each provider's volume. For more details, see Section 5. ( $N = 14,445$  unique provider identifiers.)

Appendix Table A1: Composition

|                         | (1)            | (2)             | (3)            | (4)            | (5)            |
|-------------------------|----------------|-----------------|----------------|----------------|----------------|
|                         | Enter          | Exit            | Age            | Female         | White          |
| Treatment $\times$ Post | .011<br>(.004) | -.002<br>(.004) | .593<br>(.248) | .003<br>(.006) | .001<br>(.006) |
| Baseline Mean           | .108           | .054            | 44.3           | .521           | .441           |

**Note:** Table shows estimates for sample composition measures, including Medicaid entry and exit, mean age, share white, and share female from estimating the pooled version of the reduced form specification in Equation (1). We control for service area by year fixed effects. Standard errors are clustered at the county level. For more details, see Section 4. ( $N = 168,658$  beneficiary-years.)

Appendix Table A2: Rx Outcomes

|                                     | (1)           | (2)                  | (3)            | (4)                          | (5)                                | (6)                          | (7)                                | (8)                                | (9)                                      |
|-------------------------------------|---------------|----------------------|----------------|------------------------------|------------------------------------|------------------------------|------------------------------------|------------------------------------|------------------------------------------|
|                                     | Spending      | Any<br>Prescriptions | Days<br>Supply | Spending<br>Branded<br>Drugs | Days<br>Supply<br>Branded<br>Drugs | Spending<br>Generic<br>Drugs | Days<br>Supply<br>Generic<br>Drugs | Spending<br>High<br>Value<br>Drugs | Days<br>Supply<br>High<br>Value<br>Drugs |
| Treatment $\times$ Post (2007-2008) | 80<br>(15.2)  | -.001<br>(.004)      | 38.8<br>(5.21) | 52.7<br>(13.8)               | 13.1<br>(2.08)                     | 23.6<br>(2.94)               | 23.5<br>(3.28)                     | 29.1<br>(8.12)                     | 11.6<br>(2.28)                           |
| Treatment $\times$ Post (2009-2010) | 210<br>(25.3) | .002<br>(.005)       | 78.9<br>(8.7)  | 154<br>(20.1)                | 25.1<br>(3.02)                     | 46.3<br>(6.41)               | 49.1<br>(5.87)                     | 67.4<br>(10.3)                     | 25.1<br>(3.51)                           |
| IV Coefficient                      | 199<br>(22.3) | .001<br>(.005)       | 79.7<br>(6.70) | 142<br>(19)                  | 25.8<br>(2.64)                     | 47.3<br>(5.11)               | 49.2<br>(4.46)                     | 65.8<br>(10.3)                     | 24.9<br>(3.01)                           |
| Baseline Mean                       | 623           | .676                 | 187            | 524                          | 95                                 | 84                           | 84                                 | 260                                | 77                                       |
| Percent Change                      | .32<br>(.036) | .001<br>(.007)       | .427<br>(.036) | .272<br>(.036)               | .271<br>(.028)                     | .564<br>(.061)               | .583<br>(.053)                     | .253<br>(.04)                      | .325<br>(.039)                           |
| Individual Fixed Effects            | X             | X                    | X              | X                            | X                                  | X                            | X                                  | X                                  | X                                        |

**Note:** Table shows reduced form and instrumental variable estimates for prescription drug outcomes. The first row shows estimates of control-treatment differences from estimating the pooled version of the reduced form specification in Equation (1) and the second row shows estimates of the impact of Medicaid managed care from estimating our instrumental variable specification, when the post-period is broken into two separate periods, 2007-2008 and 2009-2010. We estimate the IV coefficient using the two separate treatment  $\times$  post interaction terms as instruments. We control for service area by quarter fixed effects. Standard errors are clustered at the county level. For more details, see Section 4. ( $N = 643,751$  beneficiary-quarters.)

Appendix Table A3: Therapeutic Classes

(a) Spending

|                          | (1)<br>Anti-<br>Infective<br>Agents | (2)<br>Anti-<br>neo-<br>plastic<br>Agents | (3)<br>Auto-<br>nomic<br>Drugs | (4)<br>Blood<br>Form/<br>Coagul<br>Agents | (5)<br>Cardio-<br>vascular<br>Agents | (6)<br>Central<br>Nervous<br>System | (7)<br>Gastro-<br>intestinal<br>Drugs | (8)<br>Hormones &<br>Synthetic<br>Subst | (9)<br>Immuno-<br>suppres-<br>sants | (10)<br>Misc<br>Thera-<br>peutic<br>Agents |
|--------------------------|-------------------------------------|-------------------------------------------|--------------------------------|-------------------------------------------|--------------------------------------|-------------------------------------|---------------------------------------|-----------------------------------------|-------------------------------------|--------------------------------------------|
| Treatment $\times$ Post  | 21.1<br>(5.77)                      | 2.57<br>(3.51)                            | 9.61<br>(2.57)                 | 2.44<br>(7.15)                            | 20.7<br>(2.92)                       | 46.1<br>(9.02)                      | 15.3<br>(3.52)                        | 9.13<br>(4.02)                          | -.948<br>(4.11)                     | -4.33<br>(4.25)                            |
| IV Coefficient           | 28.1<br>(7.76)                      | 3.43<br>(4.39)                            | 12.8<br>(2.93)                 | 3.26<br>(8.94)                            | 27.6<br>(3.79)                       | 61.6<br>(11.5)                      | 20.4<br>(4.01)                        | 12.2<br>(4.77)                          | -1.27<br>(5.16)                     | -5.79<br>(5.33)                            |
| Baseline Mean            | 47.8                                | 11.2                                      | 18.1                           | 19.5                                      | 66.4                                 | 305                                 | 34.8                                  | 52                                      | 19.0                                | 10.6                                       |
| Percent Change           | .588<br>(.162)                      | .306<br>(.391)                            | .71<br>(.162)                  | .167<br>(.459)                            | .416<br>(.057)                       | .202<br>(.038)                      | .587<br>(.115)                        | .234<br>(.091)                          | -.067<br>(.272)                     | -.547<br>(.504)                            |
| Individual Fixed Effects | X                                   | X                                         | X                              | X                                         | X                                    | X                                   | X                                     | X                                       | X                                   | X                                          |

(b) Any Spending

|                          | (1)<br>Anti-<br>Infective<br>Agents | (2)<br>Anti-<br>neo-<br>plastic<br>Agents | (3)<br>Auto-<br>nomic<br>Drugs | (4)<br>Blood<br>Form/<br>Coagul<br>Agents | (5)<br>Cardio-<br>vascular<br>Agents | (6)<br>Central<br>Nervous<br>System | (7)<br>Gastro-<br>intestinal<br>Drugs | (8)<br>Hormones &<br>Synthetic<br>Subst | (9)<br>Immuno-<br>suppres-<br>sants | (10)<br>Misc<br>Thera-<br>peutic<br>Agents |
|--------------------------|-------------------------------------|-------------------------------------------|--------------------------------|-------------------------------------------|--------------------------------------|-------------------------------------|---------------------------------------|-----------------------------------------|-------------------------------------|--------------------------------------------|
| Treatment $\times$ Post  | .053<br>(.007)                      | .004<br>(.001)                            | .050<br>(.006)                 | .007<br>(.002)                            | .035<br>(.007)                       | .029<br>(.005)                      | .046<br>(.007)                        | .043<br>(.007)                          | .001<br>(.001)                      | .013<br>(.003)                             |
| IV Coefficient           | .071<br>(.007)                      | .006<br>(.001)                            | .067<br>(.007)                 | .009<br>(.003)                            | .046<br>(.008)                       | .039<br>(.006)                      | .061<br>(.008)                        | .058<br>(.008)                          | .002<br>(.002)                      | .017<br>(.003)                             |
| Baseline Mean            | .213                                | .013                                      | .156                           | .05                                       | .266                                 | .504                                | .144                                  | .231                                    | .008                                | .026                                       |
| Percent Change           | .332<br>(.032)                      | .457<br>(.103)                            | .426<br>(.044)                 | .184<br>(.061)                            | .174<br>(.030)                       | .077<br>(.011)                      | .423<br>(.055)                        | .251<br>(.033)                          | .201<br>(.189)                      | .646<br>(.115)                             |
| Individual Fixed Effects | X                                   | X                                         | X                              | X                                         | X                                    | X                                   | X                                     | X                                       | X                                   | X                                          |

**Note:** Table shows reduced form and instrumental variable estimates for the most common therapeutic classes. The first row shows estimates of control-treatment differences from estimating the pooled version of the reduced form specification in Equation (1) and the second row shows estimates of the impact of Medicaid managed care from estimating our instrumental variable specification, pooling over the entire post-period. We control for service area by quarter fixed effects. Standard errors are clustered at the county level. For more details, see Section 4. ( $N = 643,751$  beneficiary-quarters.)

Appendix Table A4: Outpatient Outcomes

|                                     | (1)            | (2)            | (3)                          | (4)            | (5)             | (6)             | (7)             | (8)             |
|-------------------------------------|----------------|----------------|------------------------------|----------------|-----------------|-----------------|-----------------|-----------------|
|                                     | Spending       |                | Number of<br>Outpatient Days |                | Any Use         |                 | ED Visits       |                 |
| Treatment $\times$ Post             | 366<br>(45)    |                | .310<br>(.247)               |                | -.009<br>(.004) |                 | -.048<br>(.133) |                 |
| Treatment $\times$ Post (2007-2008) |                | 200<br>(36.7)  |                              | .057<br>(.214) |                 | -.013<br>(.004) |                 | -.063<br>(.083) |
| Treatment $\times$ Post (2009-2010) |                | 501<br>(62.9)  |                              | .537<br>(.330) |                 | -.004<br>(.004) |                 | -.193<br>(.223) |
| IV Coefficient                      | 489<br>(54.3)  | 480<br>(57.5)  | .414<br>(.312)               | .423<br>(.333) | -.013<br>(.005) | -.010<br>(.005) | -.064<br>(.168) | -.176<br>(.186) |
| Baseline Mean                       | 1,551          | 1,551          | 8.20                         | 8.20           | .717            | .717            | 2.17            | 2.17            |
| Percent Change                      | .316<br>(.035) | .309<br>(.037) | .050<br>(.038)               | .052<br>(.041) | -.018<br>(.007) | -.014<br>(.007) | -.03<br>(.077)  | -.081<br>(.086) |
| Individual Fixed Effects            | X              | X              | X                            | X              | X               | X               | X               | X               |

**Note:** Table shows reduced form and instrumental variable estimates for outpatient outcomes. For each outcome, the first column shows estimates of control-treatment differences from estimating the pooled version of the reduced form specification in Equation (1) and estimates of the impact of Medicaid managed care from estimating our instrumental variable specification, pooling over the entire post-period. The second column shows reduced form and instrumental variable estimates, when the post-period is broken into two separate periods, 2007-2008 and 2009-2010. In the second and fourth columns we estimate the IV coefficient using the two separate treatment  $\times$  post interaction terms as instruments. We control for service area by quarter fixed effects. Standard errors are clustered at the county level. For more details, see Section 4. ( $N = 643,751$  beneficiary-quarters.)

Appendix Table A5: Outcomes by Age and Pre-Period Health Status (Number of Comorbidities)

| (a) Age 20-34, No Comorbidities |                                       |                               |                       |                     | (b) Age 20-34, 1-3 Comorbidites |                                       |                               |                       |                     | (c) Age 20-34, 4+ Comorbidites |                                       |                               |                       |                     |
|---------------------------------|---------------------------------------|-------------------------------|-----------------------|---------------------|---------------------------------|---------------------------------------|-------------------------------|-----------------------|---------------------|--------------------------------|---------------------------------------|-------------------------------|-----------------------|---------------------|
|                                 | (1)<br>Any<br>Inpatient<br>Admissions | (2)<br>Outpatient<br>Spending | (3)<br>Rx<br>Spending | (4)<br>ED<br>Visits |                                 | (1)<br>Any<br>Inpatient<br>Admissions | (2)<br>Outpatient<br>Spending | (3)<br>Rx<br>Spending | (4)<br>ED<br>Visits |                                | (1)<br>Any<br>Inpatient<br>Admissions | (2)<br>Outpatient<br>Spending | (3)<br>Rx<br>Spending | (4)<br>ED<br>Visits |
| Treatment $\times$ Post         | -.002<br>(.002)                       | 342<br>(94.6)                 | 55.2<br>(16.4)        | -.119<br>(.107)     |                                 | -.006<br>(.003)                       | 433<br>(108)                  | 63.7<br>(51.2)        | -.471<br>(.217)     |                                | .017<br>(.028)                        | 1,280<br>(681)                | -.221<br>(366)        | .369<br>(1.29)      |
| IV Coefficient                  | -.003<br>(.003)                       | 496<br>(136)                  | 80.1<br>(22.4)        | -.173<br>(.148)     |                                 | -.010<br>(.005)                       | 714<br>(195)                  | 105<br>(79.1)         | -.776<br>(.369)     |                                | .033<br>(.049)                        | 2,393<br>(1,235)              | -.413<br>(624)        | .691<br>(2.27)      |
| Baseline Mean                   | .007                                  | 760                           | 147                   | .399                |                                 | .041                                  | 2,385                         | 697                   | 1.63                |                                | .266                                  | 4,651                         | 1,347                 | 7.58                |
| Percent Change                  | -.369<br>(.432)                       | .653<br>(.179)                | .544<br>(.152)        | -.432<br>(.371)     |                                 | -.251<br>(.121)                       | .299<br>(.082)                | .151<br>(.114)        | -.475<br>(.226)     |                                | .123<br>(.185)                        | .515<br>(.265)                | -.306<br>(.463)       | .091<br>(.300)      |

  

| (d) Age 35-49, No Comorbidities |                                       |                               |                       |                     | (e) Age 35-49, 1-3 Comorbidites |                                       |                               |                       |                     | (f) Age 35-49, 4+ Comorbidites |                                       |                               |                       |                     |
|---------------------------------|---------------------------------------|-------------------------------|-----------------------|---------------------|---------------------------------|---------------------------------------|-------------------------------|-----------------------|---------------------|--------------------------------|---------------------------------------|-------------------------------|-----------------------|---------------------|
|                                 | (1)<br>Any<br>Inpatient<br>Admissions | (2)<br>Outpatient<br>Spending | (3)<br>Rx<br>Spending | (4)<br>ED<br>Visits |                                 | (1)<br>Any<br>Inpatient<br>Admissions | (2)<br>Outpatient<br>Spending | (3)<br>Rx<br>Spending | (4)<br>ED<br>Visits |                                | (1)<br>Any<br>Inpatient<br>Admissions | (2)<br>Outpatient<br>Spending | (3)<br>Rx<br>Spending | (4)<br>ED<br>Visits |
| Treatment $\times$ Post         | -.008<br>(.006)                       | 216<br>(84.4)                 | 39.1<br>(23.2)        | -.122<br>(.329)     |                                 | -.005<br>(.004)                       | 186<br>(54.1)                 | 140<br>(32.2)         | -.150<br>(.223)     |                                | -.039<br>(.014)                       | 432<br>(190)                  | 429<br>(121)          | .944<br>(.511)      |
| IV Coefficient                  | -.012<br>(.008)                       | 302<br>(112)                  | 54.5<br>(30.2)        | -.170<br>(.429)     |                                 | -.007<br>(.005)                       | 239<br>(64)                   | 181<br>(37.8)         | -.193<br>(.275)     |                                | -.050<br>(.017)                       | 552<br>(229)                  | 549<br>(140)          | 1.21<br>(.626)      |
| Baseline Mean                   | .006                                  | 312                           | 108                   | .544                |                                 | .05                                   | 1,334                         | 708                   | 2.01                |                                | .262                                  | 2,923                         | 1,132                 | 6.85                |
| Percent Change                  | -1.95<br>(1.32)                       | .966<br>(.360)                | .507<br>(.281)        | -.313<br>(.788)     |                                 | -.136<br>(.101)                       | .179<br>(.048)                | .255<br>(.053)        | -.096<br>(.137)     |                                | -.189<br>(.064)                       | .189<br>(.078)                | .485<br>(.124)        | .176<br>(.091)      |

  

| (g) Age 50-64, No Comorbidities |                                       |                               |                       |                     | (h) Age 50-64, 1-3 Comorbidites |                                       |                               |                       |                     | (i) Age 50-64, 4+ Comorbidites |                                       |                               |                       |                     |
|---------------------------------|---------------------------------------|-------------------------------|-----------------------|---------------------|---------------------------------|---------------------------------------|-------------------------------|-----------------------|---------------------|--------------------------------|---------------------------------------|-------------------------------|-----------------------|---------------------|
|                                 | (1)<br>Any<br>Inpatient<br>Admissions | (2)<br>Outpatient<br>Spending | (3)<br>Rx<br>Spending | (4)<br>ED<br>Visits |                                 | (1)<br>Any<br>Inpatient<br>Admissions | (2)<br>Outpatient<br>Spending | (3)<br>Rx<br>Spending | (4)<br>ED<br>Visits |                                | (1)<br>Any<br>Inpatient<br>Admissions | (2)<br>Outpatient<br>Spending | (3)<br>Rx<br>Spending | (4)<br>ED<br>Visits |
| Treatment $\times$ Post         | -.005<br>(.005)                       | 119<br>(83.5)                 | 94.9<br>(31.4)        | .077<br>(.154)      |                                 | .002<br>(.004)                        | 338<br>(59.5)                 | 177<br>(24.8)         | .086<br>(.139)      |                                | -.010<br>(.009)                       | 775<br>(190)                  | 292<br>(52.4)         | .131<br>(.302)      |
| IV Coefficient                  | -.006<br>(.006)                       | 157<br>(99.7)                 | 125<br>(36.6)         | .101<br>(.185)      |                                 | .002<br>(.005)                        | 401<br>(66.1)                 | 210<br>(27.9)         | .102<br>(.156)      |                                | -.013<br>(.011)                       | 996<br>(236)                  | 375<br>(63.7)         | .169<br>(.366)      |
| Baseline Mean                   | .006                                  | 184                           | 98.0                  | .338                |                                 | .051                                  | 1,081                         | 606                   | 1.56                |                                | .228                                  | 2,841                         | 1,118                 | 4.93                |
| Percent Change                  | -1.05<br>(1.06)                       | .855<br>(.543)                | 1.28<br>(.374)        | .300<br>(.549)      |                                 | .045<br>(.095)                        | .371<br>(.061)                | .347<br>(.046)        | .065<br>(.100)      |                                | -.057<br>(.046)                       | .350<br>(.083)                | .335<br>(.057)        | .034<br>(.074)      |

**Note:** Table shows reduced form and instrumental variable estimates for the main outcomes broken down by age and health status. Health status is measured as the average number of comorbidities during the pre-period, limiting our sample to beneficiaries for whom this measure can be generated. The first row shows estimates of control-treatment differences from estimating the pooled version of the reduced form specification in Equation (1) and the second row shows estimates of the impact of Medicaid managed care from estimating our instrumental variable specification, pooling over the entire post-period. We control for service area by quarter fixed effects. Standard errors are clustered at the county level. For more details, see Section 4. ( $N = 478,938$  beneficiary-quarters.)

Appendix Table A6: Outcomes by Age and Pre-Period Health Status (Quartile of Pre-Period Spending)

| (a) Age 20-34, Quartile 1 |                                       |                               |                       |                     | (b) Age 20-34, Quartile 2 |                                       |                               |                       |                     | (c) Age 20-34, Quartile 3 |                                       |                               |                       |                     | (d) Age 20-34, Quartile 4 |                                       |                               |                       |                     |
|---------------------------|---------------------------------------|-------------------------------|-----------------------|---------------------|---------------------------|---------------------------------------|-------------------------------|-----------------------|---------------------|---------------------------|---------------------------------------|-------------------------------|-----------------------|---------------------|---------------------------|---------------------------------------|-------------------------------|-----------------------|---------------------|
|                           | (1)<br>Any<br>Inpatient<br>Admissions | (2)<br>Outpatient<br>Spending | (3)<br>Rx<br>Spending | (4)<br>ED<br>Visits |                           | (1)<br>Any<br>Inpatient<br>Admissions | (2)<br>Outpatient<br>Spending | (3)<br>Rx<br>Spending | (4)<br>ED<br>Visits |                           | (1)<br>Any<br>Inpatient<br>Admissions | (2)<br>Outpatient<br>Spending | (3)<br>Rx<br>Spending | (4)<br>ED<br>Visits |                           | (1)<br>Any<br>Inpatient<br>Admissions | (2)<br>Outpatient<br>Spending | (3)<br>Rx<br>Spending | (4)<br>ED<br>Visits |
| Treatment × Post          | -.001<br>(.002)                       | 136<br>(72.9)                 | 57<br>(15)            | -.181<br>(.106)     |                           | -.005<br>(.004)                       | 340<br>(111)                  | 23.7<br>(35.4)        | -.401<br>(.174)     |                           | -.005<br>(.006)                       | 688<br>(130)                  | 158<br>(46.7)         | -.263<br>(.339)     |                           | .006<br>(.009)                        | 637<br>(313)                  | -34.7<br>(142)        | -.093<br>(.369)     |
| IV Coefficient            | -.001<br>(.003)                       | 176<br>(91.2)                 | 73.7<br>(18.4)        | -.235<br>(.130)     |                           | -.006<br>(.005)                       | 455<br>(153)                  | 31.7<br>(45)          | -.536<br>(.224)     |                           | -.008<br>(.009)                       | 1,055<br>(202)                | 242<br>(70.7)         | -.404<br>(.509)     |                           | .019<br>(.027)                        | 1,909<br>(924)                | -104<br>(409)         | -.277<br>(1.06)     |
| Baseline Mean             | .001                                  | 60.5                          | 32.5                  | .299                |                           | .019                                  | 343                           | 279                   | 1.15                |                           | .054                                  | 854                           | 819                   | 1.87                |                           | .109                                  | 6,892                         | 1,262                 | 3.27                |
| Percent Change            | -.819<br>(2.88)                       | 2.91<br>(1.51)                | 2.27<br>(.566)        | -.785<br>(.436)     |                           | -.327<br>(.269)                       | 1.33<br>(.448)                | .114<br>(.161)        | -.464<br>(.194)     |                           | -.145<br>(.175)                       | 1.24<br>(.237)                | .295<br>(.086)        | -.217<br>(.273)     |                           | .170<br>(.243)                        | .277<br>(.134)                | -.082<br>(.324)       | -.085<br>(.324)     |
| (e) Age 35-49, Quartile 1 |                                       |                               |                       |                     | (f) Age 35-49, Quartile 2 |                                       |                               |                       |                     | (g) Age 35-49, Quartile 3 |                                       |                               |                       |                     | (h) Age 35-49, Quartile 4 |                                       |                               |                       |                     |
|                           | (1)<br>Any<br>Inpatient<br>Admissions | (2)<br>Outpatient<br>Spending | (3)<br>Rx<br>Spending | (4)<br>ED<br>Visits |                           | (1)<br>Any<br>Inpatient<br>Admissions | (2)<br>Outpatient<br>Spending | (3)<br>Rx<br>Spending | (4)<br>ED<br>Visits |                           | (1)<br>Any<br>Inpatient<br>Admissions | (2)<br>Outpatient<br>Spending | (3)<br>Rx<br>Spending | (4)<br>ED<br>Visits |                           | (1)<br>Any<br>Inpatient<br>Admissions | (2)<br>Outpatient<br>Spending | (3)<br>Rx<br>Spending | (4)<br>ED<br>Visits |
| Treatment × Post          | -.004<br>(.003)                       | 162<br>(51.7)                 | 64.6<br>(20.1)        | -.025<br>(.268)     |                           | -.0019<br>(.00709)                    | 137<br>(81)                   | 115<br>(33.5)         | -.170<br>(.265)     |                           | -.0137<br>(.00881)                    | 336<br>(76.1)                 | 283<br>(49.6)         | .0431<br>(.279)     |                           | -.015<br>(.0107)                      | 199<br>(195)                  | 118<br>(92.3)         | .234<br>(.423)      |
| IV Coefficient            | -.005<br>(.004)                       | 213<br>(66.1)                 | 84.8<br>(25.2)        | -.033<br>(.328)     |                           | -.00238<br>(.00847)                   | 172<br>(94.9)                 | 144<br>(38.9)         | -.214<br>(.318)     |                           | -.017<br>(.0105)                      | 416<br>(89)                   | 351<br>(52.9)         | .0533<br>(.328)     |                           | -.0219<br>(.0148)                     | 290<br>(265)                  | 172<br>(126)          | .340<br>(.580)      |
| Baseline Mean             | .003                                  | 67.7                          | 33.9                  | .352                |                           | .019                                  | 339                           | 299                   | 1.35                |                           | .074                                  | 845                           | 786                   | 2.692               |                           | .211                                  | 4,201                         | 1,455                 | 5.70                |
| Percent Change            | -1.67<br>(1.25)                       | 3.15<br>(.976)                | 2.50<br>(.743)        | -.095<br>(.933)     |                           | -.125<br>(.446)                       | .506<br>(.280)                | .482<br>(.130)        | -.159<br>(.236)     |                           | -.230<br>(.141)                       | .492<br>(.105)                | .446<br>(.067)        | .020<br>(.122)      |                           | -.104<br>(.070)                       | .069<br>(.063)                | .118<br>(.087)        | .060<br>(.102)      |
| (i) Age 50-64, Quartile 1 |                                       |                               |                       |                     | (j) Age 50-64, Quartile 2 |                                       |                               |                       |                     | (k) Age 50-64, Quartile 3 |                                       |                               |                       |                     | (l) Age 50-64, Quartile 4 |                                       |                               |                       |                     |
|                           | (1)<br>Any<br>Inpatient<br>Admissions | (2)<br>Outpatient<br>Spending | (3)<br>Rx<br>Spending | (4)<br>ED<br>Visits |                           | (1)<br>Any<br>Inpatient<br>Admissions | (2)<br>Outpatient<br>Spending | (3)<br>Rx<br>Spending | (4)<br>ED<br>Visits |                           | (1)<br>Any<br>Inpatient<br>Admissions | (2)<br>Outpatient<br>Spending | (3)<br>Rx<br>Spending | (4)<br>ED<br>Visits |                           | (1)<br>Any<br>Inpatient<br>Admissions | (2)<br>Outpatient<br>Spending | (3)<br>Rx<br>Spending | (4)<br>ED<br>Visits |
| Treatment × Pos           | -.00214<br>(.00475)                   | 97.9<br>(82.9)                | 73<br>(25.7)          | .143<br>(.127)      |                           | .00243<br>(.00431)                    | 229<br>(59.6)                 | 115<br>(18.1)         | -.107<br>(.164)     |                           | -.00142<br>(.00644)                   | 620<br>(170)                  | 236<br>(25.1)         | .108<br>(.189)      |                           | -.00853<br>(.00852)                   | 555<br>(201)                  | 306<br>(67.5)         | .24<br>(.348)       |
| IV Coefficient            | -.00274<br>(.00565)                   | 126<br>(98.1)                 | 93.7<br>(30)          | .184<br>(.148)      |                           | .00284<br>(.00478)                    | 268<br>(64.3)                 | 134<br>(19.3)         | -.125<br>(.183)     |                           | -.00168<br>(.00731)                   | 737<br>(197)                  | 280<br>(27.6)         | .129<br>(.215)      |                           | -.0111<br>(.0106)                     | 724<br>(235)                  | 399<br>(81.2)         | .313<br>(.425)      |
| Baseline Mean             | .003                                  | 68.6                          | 35.2                  | .246                |                           | .017                                  | 350                           | 329                   | 1.10                |                           | .073                                  | 877                           | 749                   | 2.04                |                           | .237                                  | 3,726                         | 1,282                 | 4.95                |
| Percent Change            | -.914<br>(1.88)                       | 1.832<br>(1.43)               | 2.66<br>(.852)        | .746<br>(.602)      |                           | .167<br>(.281)                        | .766<br>(.184)                | .407<br>(.059)        | -.114<br>(.167)     |                           | -.023<br>(.100)                       | .84<br>(.224)                 | .373<br>(.037)        | .063<br>(.105)      |                           | -.047<br>(.045)                       | .194<br>(.063)                | .311<br>(.063)        | .063<br>(.086)      |

**Note:** Table shows reduced form and instrumental variable estimates for the main outcomes broken down by age and health status. Health status is measured as quartile of average spending during the pre-period, limiting our sample to beneficiaries for whom this measure can be generated. The first row shows estimates of control-treatment differences from estimating the pooled version of the reduced form specification in Equation (1) and the second row shows estimates of the impact of Medicaid managed care from estimating our instrumental variable specification, pooling over the entire post-period. We control for service area by quarter fixed effects. Standard errors are clustered at the county level. For more details, see Section 4. ( $N = 478,938$  beneficiary-quarters.)

Appendix Table A7: Main Outcomes (Balanced Panel)

(a) 2005-2008

|                          | (1)<br>Healthcare<br>Spending | (2)<br>Rx<br>Spending | (3)<br>Outpatient<br>Spending | (4)<br>Inpatient<br>Spending |
|--------------------------|-------------------------------|-----------------------|-------------------------------|------------------------------|
| Treatment $\times$ Post  | 305<br>(67)                   | 100<br>(19)           | 251<br>(43)                   | -46<br>(27)                  |
| IV Coefficient           | 400<br>(81)                   | 132<br>(21)           | 329<br>(54)                   | -61<br>(34)                  |
| Baseline Mean            | 2,803                         | 757                   | 1,680                         | 367                          |
| Percent Change           | .143<br>(.029)                | .174<br>(.028)        | .196<br>(.032)                | -.166<br>(.094)              |
| Individual Fixed Effects | X                             | X                     | X                             | X                            |

(b) 2004-2010

|                                     | (1)<br>Healthcare<br>Spending | (2)<br>Rx<br>Spending | (3)<br>Rx<br>Spending | (4)<br>Rx<br>Spending | (5)<br>Outpatient<br>Spending | (6)<br>Outpatient<br>Spending | (7)<br>Inpatient<br>Spending | (8)<br>Inpatient<br>Spending |
|-------------------------------------|-------------------------------|-----------------------|-----------------------|-----------------------|-------------------------------|-------------------------------|------------------------------|------------------------------|
| Treatment $\times$ Post             | 493<br>(76)                   |                       | 130<br>(25)           |                       | 395<br>(55)                   |                               | -32<br>(18)                  |                              |
| Treatment $\times$ Post (2007-2008) |                               | 271<br>(68)           |                       | 94<br>(20)            |                               | 203<br>(50)                   |                              | -26<br>(20)                  |
| Treatment $\times$ Post (2009-2010) |                               | 660<br>(83)           |                       | 160<br>(30)           |                               | 522<br>(65)                   |                              | -21<br>(23)                  |
| IV Coefficient                      | 643<br>(92)                   | 628<br>(89)           | 169<br>(29)           | 169<br>(28)           | 516<br>(71)                   | 489<br>(70)                   | -42<br>(24)                  | -30<br>(23)                  |
| Baseline Mean                       | 2,685                         | 2,685                 | 733                   | 733                   | 1,644                         | 1,644                         | 309                          | 309                          |
| Percent Change                      | .240<br>(.034)                | .234<br>(.033)        | .231<br>(.040)        | .231<br>(.039)        | .314<br>(.043)                | .297<br>(.043)                | -.135<br>(.077)              | -.098<br>(.073)              |
| Individual Fixed Effects            | X                             | X                     | X                     | X                     | X                             | X                             | X                            | X                            |

**Note:** Table shows reduced form and instrumental variable estimates for the main outcomes in a balanced panel. Panel (a) shows a shorter panel, for 2005-2008 and Panel (b) shows all years, 2004-2010. In Panel (b), for each outcome, the first and third columns show estimates of control-treatment differences from estimating the pooled version of the reduced form specification in Equation (1) and estimates of the impact of Medicaid managed care from estimating our instrumental variable specification, pooling over the entire post-period. The second and fourth columns show reduced form and instrumental variable estimates, when the post-period is broken into two separate periods, 2007-2008 and 2009-2010. In the second and fourth columns we estimate the IV coefficient using the two separate treatment  $\times$  post interaction terms as instruments. We control for service area by quarter fixed effects. Standard errors are clustered at the county level. For more details, see Section 4. ( $N = 172,496$  beneficiary-quarters in Panel (a).  $N = 187,684$  beneficiary-quarters in Panel (b).)

Appendix Table A8: Main Outcomes (Bexar Service Area)

|                                     | (1)                 | (2)            | (3)            | (4)            | (5)            | (6)            | (7)            | (8)            | (9)                 | (10)           | (11)           | (12)           | (13)               | (14)            | (15)           | (16)           |
|-------------------------------------|---------------------|----------------|----------------|----------------|----------------|----------------|----------------|----------------|---------------------|----------------|----------------|----------------|--------------------|-----------------|----------------|----------------|
|                                     | Healthcare Spending |                |                |                | Rx Spending    |                |                |                | Outpatient Spending |                |                |                | Inpatient Spending |                 |                |                |
| Treatment $\times$ Post             | 324<br>(118)        |                | 444<br>(181)   |                | 109<br>(47.7)  |                | 118<br>(70.5)  |                | 255<br>(87.1)       |                | 314<br>(91.7)  |                | -39.7<br>(84.8)    |                 | 11.4<br>(90.3) |                |
| Treatment $\times$ Post (2007-2008) |                     | 236<br>(121)   |                | 278<br>(127)   |                | 53.2<br>(36.7) |                | 40.7<br>(28)   |                     | 184<br>(79.2)  |                | 222<br>(60.8)  |                    | -.541<br>(94.2) |                | 15.4<br>(78.9) |
| Treatment $\times$ Post (2009-2010) |                     | 411<br>(115)   |                | 566<br>(271)   |                | 182<br>(76.9)  |                | 174<br>(108)   |                     | 269<br>(101)   |                | 361<br>(154)   |                    | -39.4<br>(84.6) |                | 31.7<br>(108)  |
| IV Coefficient                      | 409<br>(131)        | 407<br>(127)   | 651<br>(274)   | 638<br>(285)   | 137<br>(55.7)  | 150<br>(61.8)  | 173<br>(100)   | 167<br>(97)    | 322<br>(94.6)       | 283<br>(97.1)  | 461<br>(145)   | 436<br>(155)   | -50.2<br>(98.5)    | -26<br>(95.8)   | 16.8<br>(129)  | 35.7<br>(123)  |
| Baseline Mean                       | 2,711               | 2,711          | 2,711          | 2,711          | 700            | 700            | 700            | 700            | 1,388               | 1,388          | 1,388          | 1,388          | 623                | 623             | 623            | 623            |
| Percent Change                      | .151<br>(.048)      | .150<br>(.047) | .240<br>(.101) | .235<br>(.105) | .196<br>(.079) | .214<br>(.088) | .248<br>(.143) | .238<br>(.138) | .232<br>(.068)      | .204<br>(.070) | .332<br>(.105) | .314<br>(.112) | -.081<br>(.158)    | -.042<br>(.154) | .027<br>(.206) | .057<br>(.198) |
| Individual Fixed Effects            | X                   | X              |                |                | X              | X              |                |                | X                   | X              |                |                | X                  | X               |                |                |

**Note:** Table shows reduced form and instrumental variable estimates for the main outcomes in Texas's Bexar Service Area. For each outcome, the first and third columns show estimates of control-treatment differences from estimating the pooled version of the reduced form specification in Equation (1) and estimates of the impact of Medicaid managed care from estimating our instrumental variable specification, pooling over the entire post-period. The second and fourth columns show reduced form and instrumental variable estimates, when the post-period is broken into two separate periods, 2007-2008 and 2009-2010. In the second and fourth columns we estimate the IV coefficient using the two separate treatment  $\times$  post interaction terms as instruments. Standard errors are clustered at the county level. For more details, see Section 4. ( $N = 96,678$  beneficiary-quarters.)

Appendix Table A9: Main Outcomes (Harris Service Area)

|                                     | (1)                 | (2)            | (3)            | (4)            | (5)            | (6)            | (7)            | (8)            | (9)                 | (10)           | (11)           | (12)          | (13)               | (14)            | (15)            | (16)            |
|-------------------------------------|---------------------|----------------|----------------|----------------|----------------|----------------|----------------|----------------|---------------------|----------------|----------------|---------------|--------------------|-----------------|-----------------|-----------------|
|                                     | Healthcare Spending |                |                |                | Rx Spending    |                |                |                | Outpatient Spending |                |                |               | Inpatient Spending |                 |                 |                 |
| Treatment $\times$ Post             | 502<br>(135)        |                | 464<br>(126)   |                | 138<br>(29.6)  |                | 146<br>(41.5)  |                | 436<br>(89.5)       |                | 380<br>(79.5)  |               | -70.9<br>(50.3)    |                 | -62.6<br>(50.6) |                 |
| Treatment $\times$ Post (2007-2008) |                     | 203<br>(119)   |                | 238<br>(125)   |                | 80.7<br>(21.3) |                | 102<br>(37.6)  |                     | 228<br>(85.2)  |                | 220<br>(85)   |                    | -105<br>(58.6)  |                 | -83.5<br>(57.9) |
| Treatment $\times$ Post (2009-2010) |                     | 865<br>(165)   |                | 640<br>(151)   |                | 211<br>(39.9)  |                | 180<br>(52.5)  |                     | 672<br>(121)   |                | 499<br>(91.4) |                    | -17.9<br>(73.1) |                 | -40<br>(59)     |
| IV Coefficient                      | 665<br>(175)        | 742<br>(168)   | 736<br>(203)   | 745<br>(209)   | 183<br>(34.6)  | 198<br>(34.3)  | 232<br>(66.5)  | 233<br>(72.1)  | 577<br>(130)        | 616<br>(145)   | 603<br>(132)   | 604<br>(138)  | -93.9<br>(60.7)    | -72.8<br>(48)   | -99.4<br>(76)   | -91.8<br>(77.3) |
| Baseline Mean                       | 3,042               | 3,042          | 3,042          | 3,042          | 637            | 637            | 637            | 637            | 1,631               | 1,631          | 1,631          | 1,631         | 773                | 773             | 773             | 773             |
| Percent Change                      | .219<br>(.057)      | .244<br>(.055) | .242<br>(.067) | .245<br>(.069) | .286<br>(.054) | .311<br>(.054) | .365<br>(.104) | .366<br>(.113) | .354<br>(.08)       | .378<br>(.089) | .369<br>(.081) | .37<br>(.085) | -.121<br>(.079)    | -.094<br>(.062) | -.129<br>(.098) | -.119<br>(.100) |
| Individual Fixed Effects            | X                   | X              |                |                | X              | X              |                |                | X                   | X              |                |               | X                  | X               |                 |                 |

**Note:** Table shows reduced form and instrumental variable estimates for the main outcomes in Texas's Harris Service Area. For each outcome, the first and third columns show estimates of control-treatment differences from estimating the pooled version of the reduced form specification in Equation (1) and estimates of the impact of Medicaid managed care from estimating our instrumental variable specification, pooling over the entire post-period. The second and fourth columns show reduced form and instrumental variable estimates, when the post-period is broken into two separate periods, 2007-2008 and 2009-2010. In the second and fourth columns we estimate the IV coefficient using the two separate treatment  $\times$  post interaction terms as instruments. Standard errors are clustered at the county level. For more details, see Section 4. ( $N = 179,623$  beneficiary-quarters.)

Appendix Table A10: Main Outcomes (Nueces Service Area)

|                                     | (1)                 | (2)            | (3)            | (4)            | (5)            | (6)            | (7)            | (8)            | (9)                 | (10)           | (11)           | (12)           | (13)               | (14)            | (15)            | (16)            |
|-------------------------------------|---------------------|----------------|----------------|----------------|----------------|----------------|----------------|----------------|---------------------|----------------|----------------|----------------|--------------------|-----------------|-----------------|-----------------|
|                                     | Healthcare Spending |                |                |                | Rx Spending    |                |                |                | Outpatient Spending |                |                |                | Inpatient Spending |                 |                 |                 |
| Treatment $\times$ Post             | 664<br>(170)        |                | 534<br>(151)   |                | 220<br>(46.9)  |                | 181<br>(42.8)  |                | 499<br>(124)        |                | 446<br>(119)   |                | -53.8<br>(42.9)    |                 | -93.3<br>(51.1) |                 |
| Treatment $\times$ Post (2007-2008) |                     | 342<br>(155)   |                | 402<br>(132)   |                | 146<br>(38.3)  |                | 114<br>(39.1)  |                     | 262<br>(88.5)  |                | 310<br>(90)    |                    | -65.7<br>(66.2) |                 | -21.8<br>(51)   |
| Treatment $\times$ Post (2009-2010) |                     | 917<br>(227)   |                | 600<br>(183)   |                | 298<br>(54.9)  |                | 225<br>(46.2)  |                     | 674<br>(189)   |                | 522<br>(146)   |                    | -55<br>(39.5)   |                 | -147<br>(70)    |
| IV Coefficient                      | 766<br>(180)        | 719<br>(184)   | 715<br>(194)   | 678<br>(183)   | 253<br>(49.9)  | 253<br>(47.5)  | 243<br>(54.7)  | 232<br>(53)    | 575<br>(131)        | 535<br>(139)   | 597<br>(153)   | 565<br>(146)   | -62.1<br>(45.7)    | -68.6<br>(50.8) | -125<br>(66.3)  | -119<br>(62.2)  |
| Baseline Mean                       | 2,898               | 2,898          | 2,898          | 2,898          | 640            | 640            | 640            | 640            | 1,590               | 1,590          | 1,590          | 1,590          | 668                | 668             | 668             | 668             |
| Percent Change                      | .264<br>(.062)      | .248<br>(.064) | .247<br>(.067) | .234<br>(.063) | .396<br>(.078) | .396<br>(.074) | .379<br>(.085) | .363<br>(.083) | .362<br>(.082)      | .336<br>(.087) | .376<br>(.096) | .356<br>(.092) | -.093<br>(.068)    | -.103<br>(.076) | -.187<br>(.099) | -.178<br>(.093) |
| Individual Fixed Effects            | X                   | X              |                |                | X              | X              |                |                | X                   | X              |                |                | X                  | X               |                 |                 |

**Note:** Table shows reduced form and instrumental variable estimates for the main outcomes in Texas's Nueces Service Area. For each outcome, the first and third columns show estimates of control-treatment differences from estimating the pooled version of the reduced form specification in Equation (1) and estimates of the impact of Medicaid managed care from estimating our instrumental variable specification, pooling over the entire post-period. The second and fourth columns show reduced form and instrumental variable estimates, when the post-period is broken into two separate periods, 2007-2008 and 2009-2010. In the second and fourth columns we estimate the IV coefficient using the two separate treatment  $\times$  post interaction terms as instruments. Standard errors are clustered at the county level. For more details, see Section 4. ( $N = 115,986$  beneficiary-quarters.)

Appendix Table A11: Main Outcomes (Travis Service Area)

|                                     | (1)                 | (2)            | (3)            | (4)           | (5)            | (6)            | (7)            | (8)            | (9)                 | (10)           | (11)          | (12)           | (13)               | (14)             | (15)           | (16)           |
|-------------------------------------|---------------------|----------------|----------------|---------------|----------------|----------------|----------------|----------------|---------------------|----------------|---------------|----------------|--------------------|------------------|----------------|----------------|
|                                     | Healthcare Spending |                |                |               | Rx Spending    |                |                |                | Outpatient Spending |                |               |                | Inpatient Spending |                  |                |                |
| Treatment $\times$ Post             | 391<br>(87.1)       |                | 335<br>(65.5)  |               | 119<br>(22.1)  |                | 119<br>(19.2)  |                | 320<br>(55.3)       |                | 208<br>(36.9) |                | -48<br>(36.2)      |                  | 7.83<br>(22.2) |                |
| Treatment $\times$ Post (2007-2008) |                     | 223<br>(55.2)  |                | 225<br>(80.8) |                | 60.7<br>(18.3) |                | 72.2<br>(17.8) |                     | 162<br>(55.6)  |               | 126<br>(51.5)  |                    | -.0785<br>(21.6) |                | 27<br>(26.4)   |
| Treatment $\times$ Post (2009-2010) |                     | 550<br>(109)   |                | 372<br>(85)   |                | 183<br>(27.3)  |                | 149<br>(20.9)  |                     | 439<br>(64.1)  |               | 222<br>(49.2)  |                    | -.71<br>(43.1)   |                | .543<br>(30.8) |
| IV Coefficient                      | 587<br>(119)        | 611<br>(103)   | 587<br>(111)   | 551<br>(130)  | 179<br>(29.6)  | 195<br>(29.7)  | 209<br>(32.6)  | 209<br>(32.2)  | 480<br>(76)         | 478<br>(71.3)  | 364<br>(62.2) | 324<br>(66.4)  | -72<br>(49.4)      | -62.4<br>(41.3)  | 13.7<br>(37.6) | 18.6<br>(48.4) |
| Baseline Mean                       | 2,621               | 2,621          | 2,621          | 2,621         | 573            | 573            | 573            | 573            | 1,517               | 1,517          | 1,517         | 1,517          | 530                | 530              | 530            | 530            |
| Percent Change                      | .224<br>(.045)      | .233<br>(.039) | .224<br>(.043) | .21<br>(.049) | .312<br>(.052) | .34<br>(.052)  | .365<br>(.057) | .365<br>(.056) | .316<br>(.05)       | .315<br>(.047) | .24<br>(.041) | .213<br>(.044) | -.136<br>(.093)    | -.118<br>(.078)  | .026<br>(.071) | .035<br>(.091) |
| Individual Fixed Effects            | X                   | X              |                |               | X              | X              |                |                | X                   | X              |               |                | X                  | X                |                |                |

**Note:** Table shows reduced form and instrumental variable estimates for the main outcomes in Texas's Travis Service Area. For each outcome, the first and third columns show estimates of control-treatment differences from estimating the pooled version of the reduced form specification in Equation (1) and estimates of the impact of Medicaid managed care from estimating our instrumental variable specification, pooling over the entire post-period. The second and fourth columns show reduced form and instrumental variable estimates, when the post-period is broken into two separate periods, 2007-2008 and 2009-2010. In the second and fourth columns we estimate the IV coefficient using the two separate treatment  $\times$  post interaction terms as instruments. Standard errors are clustered at the county level. For more details, see Section 4. ( $N = 251,464$  beneficiary-quarters.)

Appendix Table A12: Central Nervous System Classes

| (a) Spending            |                                            |                                          |                           |                                             |                                           |                   |                                              |                                             |                              |                |
|-------------------------|--------------------------------------------|------------------------------------------|---------------------------|---------------------------------------------|-------------------------------------------|-------------------|----------------------------------------------|---------------------------------------------|------------------------------|----------------|
|                         | (1)                                        | (2)                                      | (3)                       | (4)                                         | (5)                                       | (6)               | (7)                                          | (8)                                         | (9)                          | (10)           |
|                         | Analg/<br>Antipyr,<br>Nonstr/<br>Antiinflm | Analg/<br>Antipyr,<br>Opiate<br>Agonists | Analg/<br>Antipyr,<br>NEC | Anti-<br>convulsant,<br>Benzo-<br>diazepine | Anti-<br>conv,<br>Hydantoin<br>Derivative | Anticonv,<br>Misc | Psych<br>other,<br>Anti-<br>depres-<br>sants | Psychother,<br>Tranq/<br>Anti-<br>psychotic | ASH,<br>Benzo-<br>diazepines | ASH,<br>NEC    |
| Treatment $\times$ Post | 2.15<br>(.475)                             | 2.62<br>(4.49)                           | 1.1<br>(.291)             | .27<br>(.0928)                              | .351<br>(.2)                              | 7.51<br>(3.33)    | 5.72<br>(2.55)                               | 15.8<br>(5.23)                              | 1.12<br>(.542)               | 2.91<br>(.715) |
| IV Coefficient          | 2.88<br>(.612)                             | 3.5<br>(5.62)                            | 1.47<br>(.379)            | .361<br>(.113)                              | .469<br>(.252)                            | 10<br>(4.34)      | 7.64<br>(3.05)                               | 21.1<br>(6.66)                              | 1.5<br>(.678)                | 3.89<br>(.896) |
| Baseline Mean           | 9.77                                       | 25.1                                     | 2.50                      | 1.15                                        | 2.64                                      | 75.8              | 39.4                                         | 125.1                                       | 4.93                         | 8.80           |
| Percent Change          | .295<br>(.063)                             | .139<br>(.224)                           | .587<br>(.152)            | .315<br>(.099)                              | .177<br>(.095)                            | .132<br>(.057)    | .194<br>(.077)                               | .169<br>(.053)                              | .303<br>(.137)               | .442<br>(.102) |

  

| (b) Any Spending        |                                            |                                          |                           |                                             |                                      |                   |                                     |                                             |                              |                |
|-------------------------|--------------------------------------------|------------------------------------------|---------------------------|---------------------------------------------|--------------------------------------|-------------------|-------------------------------------|---------------------------------------------|------------------------------|----------------|
|                         | (1)                                        | (2)                                      | (3)                       | (4)                                         | (5)                                  | (6)               | (7)                                 | (8)                                         | (9)                          | (10)           |
|                         | Analg/<br>Antipyr,<br>Nonstr/<br>Antiinflm | Analg/<br>Antipyr,<br>Opiate<br>Agonists | Analg/<br>Antipyr,<br>NEC | Anti-<br>convulsant,<br>Benzo-<br>diazepine | Anticonv,<br>Hydantoin<br>Derivative | Anticonv,<br>Misc | Psychother,<br>Anti-<br>depressants | Psychother,<br>Tranq/<br>Anti-<br>psychotic | ASH,<br>Benzo-<br>diazepines | ASH,<br>NEC    |
| Treatment $\times$ Post | .042<br>(.005)                             | .025<br>(.007)                           | .017<br>(.003)            | .004<br>(.001)                              | .004<br>(.002)                       | .015<br>(.004)    | .037<br>(.005)                      | .018<br>(.003)                              | .020<br>(.005)               | .025<br>(.002) |
| IV Coefficient          | .056<br>(.005)                             | .034<br>(.008)                           | .023<br>(.004)            | .006<br>(.002)                              | .006<br>(.002)                       | .020<br>(.005)    | .049<br>(.006)                      | .023<br>(.004)                              | .027<br>(.005)               | .034<br>(.003) |
| Baseline Mean           | .085                                       | .19                                      | .04                       | .031                                        | .029                                 | .131              | .181                                | .125                                        | .099                         | .054           |
| Percent Change          | .664<br>(.064)                             | .178<br>(.043)                           | .571<br>(.096)            | .18<br>(.061)                               | .201<br>(.079)                       | .151<br>(.038)    | .271<br>(.031)                      | .187<br>(.030)                              | .276<br>(.055)               | .629<br>(.056) |

**Note:** Table shows reduced form and instrumental variable estimates for the most common subclasses of the central nervous system therapeutic class. The first row shows estimates of control-treatment differences from estimating the pooled version of the reduced form specification in Equation (1) and the second row shows estimates of the impact of Medicaid managed care from estimating our instrumental variable specification, pooling over the entire post-period. We control for service area by quarter fixed effects. Standard errors are clustered at the county level. For more details, see Section 4. ( $N = 643,751$  beneficiary-quarters.)

Appendix Table A13: Cardiovascular Classes

| (a) Spending            |                |                   |                       |                               |                        |                  |                    |                                          |                               |                                |
|-------------------------|----------------|-------------------|-----------------------|-------------------------------|------------------------|------------------|--------------------|------------------------------------------|-------------------------------|--------------------------------|
|                         | (1)            | (2)               | (3)                   | (4)                           | (5)                    | (6)              | (7)                | (8)                                      | (9)                           | (10)                           |
|                         | NEC            | ACE<br>Inhibitors | Cardiac<br>Glycosides | Anti-<br>arrhythmic<br>Agents | Alpha-Beta<br>Blockers | Beta<br>Blockers | Calcium<br>Channel | Anti-<br>hyperlipidemic<br>Drugs,<br>NEC | Hypotensive<br>Agents,<br>NEC | Vasodilating<br>Agents,<br>NEC |
| Treatment $\times$ Post | 1.32<br>(.866) | 1.43<br>(.295)    | .0957<br>(.025)       | .101<br>(.079)                | .0219<br>(.033)        | 1.81<br>(.490)   | 1.43<br>(.599)     | 10.5<br>(2.16)                           | .961<br>(.371)                | 3.03<br>(2.17)                 |
| IV Coefficient          | 1.77<br>(1.07) | 1.91<br>(.388)    | .128<br>(.031)        | .135<br>(.0991)               | .0293<br>(.0416)       | 2.42<br>(.596)   | 1.91<br>(.765)     | 14.1<br>(2.73)                           | 1.28<br>(.45)                 | 4.04<br>(2.75)                 |
| Baseline Mean           | 8.17           | 4.85              | .169                  | .314                          | .153                   | 5.79             | 10.6               | 30.3                                     | 2.02                          | 3.44                           |
| Percent Change          | .216<br>(.130) | .394<br>(.080)    | .756<br>(.184)        | .431<br>(.316)                | .192<br>(.272)         | .418<br>(.103)   | .181<br>(.072)     | .464<br>(.090)                           | .636<br>(.223)                | 1.18<br>(.800)                 |

  

| (b) Any Spending        |                |                   |                       |                               |                        |                  |                    |                                          |                               |                                |
|-------------------------|----------------|-------------------|-----------------------|-------------------------------|------------------------|------------------|--------------------|------------------------------------------|-------------------------------|--------------------------------|
|                         | (1)            | (2)               | (3)                   | (4)                           | (5)                    | (6)              | (7)                | (8)                                      | (9)                           | (10)                           |
|                         | NEC            | ACE<br>Inhibitors | Cardiac<br>Glycosides | Anti-<br>arrhythmic<br>Agents | Alpha-Beta<br>Blockers | Beta<br>Blockers | Calcium<br>Channel | Anti-<br>hyperlipidemic<br>Drugs,<br>NEC | Hypotensive<br>Agents,<br>NEC | Vasodilating<br>Agents,<br>NEC |
| Treatment $\times$ Post | .008<br>(.004) | .027<br>(.004)    | .004<br>(.001)        | .0002<br>(.0005)              | .0004<br>(.0005)       | .024<br>(.004)   | .014<br>(.002)     | .025<br>(.007)                           | .008<br>(.002)                | .008<br>(.001)                 |
| IV Coefficient          | .010<br>(.004) | .036<br>(.004)    | .005<br>(.001)        | .0003<br>(.0007)              | .0006<br>(.0006)       | .032<br>(.005)   | .019<br>(.003)     | .034<br>(.009)                           | .010<br>(.002)                | .011<br>(.002)                 |
| Baseline Mean           | .047           | .079              | .009                  | .002                          | .002                   | .076             | .067               | .109                                     | .022                          | .017                           |
| Percent Change          | .222<br>(.095) | .454<br>(.056)    | .571<br>(.158)        | .129<br>(.326)                | .279<br>(.310)         | .421<br>(.061)   | .284<br>(.042)     | .309<br>(.080)                           | .463<br>(.101)                | .663<br>(.089)                 |

**Note:** Table shows reduced form and instrumental variable estimates for the most common subclasses of the cardiovascular agents therapeutic class. The first row shows estimates of control-treatment differences from estimating the pooled version of the reduced form specification in Equation (1) and the second row shows estimates of the impact of Medicaid managed care from estimating our instrumental variable specification, pooling over the entire post-period. We control for service area by quarter fixed effects. Standard errors are clustered at the county level. For more details, see Section 4. ( $N = 643,751$  beneficiary-quarters.)

Appendix Table A14: Hormones Classes

| (a) Spending            |                            |                                             |                             |                                          |                                                   |                                      |                                      |                               |                         |                                           |
|-------------------------|----------------------------|---------------------------------------------|-----------------------------|------------------------------------------|---------------------------------------------------|--------------------------------------|--------------------------------------|-------------------------------|-------------------------|-------------------------------------------|
|                         | (1)                        | (2)                                         | (3)                         | (4)                                      | (5)                                               | (6)                                  | (7)                                  | (8)                           | (9)                     | (10)                                      |
|                         | Adrenals<br>& Comb,<br>NEC | Contra-<br>ceptive,<br>Oral<br>Comb,<br>NEC | Estrogens<br>& Comb,<br>NEC | Anti-<br>diabetic<br>Agents,<br>Insulins | Anti-<br>diabetic<br>Agents,<br>Sulfo<br>nylureas | Anti-<br>diabetic<br>Agents,<br>Misc | Para-<br>thyroid<br>Hormones,<br>NEC | Pituitary<br>Hormones,<br>NEC | Pro-<br>gestins,<br>NEC | Thy<br>/ Antithy,<br>Thyroid/<br>Hormones |
| Treatment $\times$ Post | 5.43<br>(1.37)             | -.0425<br>(.168)                            | .616<br>(.198)              | -.139<br>(2.42)                          | 1.21<br>(.284)                                    | 2.49<br>(1.41)                       | .106<br>(.098)                       | -2.11<br>(.989)               | .0266<br>(.0545)        | .696<br>(.0994)                           |
| IV Coefficient          | 7.26<br>(1.58)             | -.0567<br>(.211)                            | .823<br>(.246)              | -.185<br>(3.03)                          | 1.61<br>(.343)                                    | 3.33<br>(1.76)                       | .141<br>(.124)                       | -2.82<br>(1.24)               | .0355<br>(.0678)        | .93<br>(.116)                             |
| Baseline Mean           | 7.60                       | 1.74                                        | 2.00                        | 13.3                                     | 4.39                                              | 18.5                                 | .356                                 | 1.77                          | .146                    | 1.64                                      |
| Percent Change          | .955<br>(.208)             | -.033<br>(.121)                             | .411<br>(.123)              | -.014<br>(.227)                          | .367<br>(.078)                                    | .18<br>(.095)                        | .397<br>(.347)                       | -1.594<br>(.700)              | .243<br>(.465)          | .566<br>(.071)                            |

| (b) Any Spending        |                            |                                             |                             |                                          |                                                   |                                      |                                      |                               |                         |                                           |
|-------------------------|----------------------------|---------------------------------------------|-----------------------------|------------------------------------------|---------------------------------------------------|--------------------------------------|--------------------------------------|-------------------------------|-------------------------|-------------------------------------------|
|                         | (1)                        | (2)                                         | (3)                         | (4)                                      | (5)                                               | (6)                                  | (7)                                  | (8)                           | (9)                     | (10)                                      |
|                         | Adrenals<br>& Comb,<br>NEC | Contra-<br>ceptive,<br>Oral<br>Comb,<br>NEC | Estrogens<br>& Comb,<br>NEC | Anti-<br>diabetic<br>Agents,<br>Insulins | Anti-<br>diabetic<br>Agents,<br>Sulfo<br>nylureas | Anti-<br>diabetic<br>Agents,<br>Misc | Para-<br>thyroid<br>Hormones,<br>NEC | Pituitary<br>Hormones,<br>NEC | Pro-<br>gestins,<br>NEC | Thy<br>/ Antithy,<br>Thyroid/<br>Hormones |
| Treatment $\times$ Post | .0318<br>(.004)            | -.0007<br>(.001)                            | .004<br>(.002)              | .001<br>(.003)                           | .015<br>(.003)                                    | .019<br>(.003)                       | .0007<br>(.0005)                     | -.0003<br>(.0003)             | .0003<br>(.0007)        | .018<br>(.004)                            |
| IV Coefficient          | .042<br>(.005)             | -.001<br>(.002)                             | .005<br>(.002)              | .002<br>(.004)                           | .020<br>(.004)                                    | .025<br>(.004)                       | .001<br>(.0006)                      | -.0004<br>(.0004)             | .0004<br>(.0009)        | .024<br>(.004)                            |
| Baseline Mean           | .049                       | .018                                        | .02                         | .047                                     | .047                                              | .07                                  | .002                                 | .002                          | .003                    | .048                                      |
| Percent Change          | .866<br>(.094)             | -.054<br>(.101)                             | .244<br>(.099)              | .041<br>(.075)                           | .418<br>(.075)                                    | .355<br>(.056)                       | .501<br>(.289)                       | -.191<br>(.192)               | .141<br>(.307)          | .503<br>(.085)                            |

**Note:** Table shows reduced form and instrumental variable estimates for the most common subclasses of the hormones and synthetic substances therapeutic class. The first row shows estimates of control-treatment differences from estimating the pooled version of the reduced form specification in Equation (1) and the second row shows estimates of the impact of Medicaid managed care from estimating our instrumental variable specification, pooling over the entire post-period. We control for service area by quarter fixed effects. Standard errors are clustered at the county level. For more details, see Section 4. ( $N = 643,751$  beneficiary-quarters.)

Appendix Table A15: Inpatient Spending on the Top 10 CCS Categories

| (a) Spending            |                                                |                       |                                                                                          |                          |                                                         |                                                         |                                                       |                                                           |                                                                 |                                           |
|-------------------------|------------------------------------------------|-----------------------|------------------------------------------------------------------------------------------|--------------------------|---------------------------------------------------------|---------------------------------------------------------|-------------------------------------------------------|-----------------------------------------------------------|-----------------------------------------------------------------|-------------------------------------------|
|                         | (1)<br>Infectious<br>and parasitic<br>Diseases | (2)<br>Neo-<br>plasms | (3)<br>Endocrine;<br>nutritional;<br>and metabolic<br>Diseases and<br>immunity disorders | (4)<br>Mental<br>Illness | (5)<br>Diseases<br>of the<br>circu-<br>latory<br>system | (6)<br>Diseases<br>of the<br>respi-<br>ratory<br>system | (7)<br>Diseases<br>of the<br>dige-<br>stive<br>system | (8)<br>Diseases<br>of the<br>genito-<br>urinary<br>system | (9)<br>Diseases<br>of the<br>skin and<br>subcutaneous<br>tissue | (10)<br>In-<br>jury<br>and poiso-<br>ning |
| Treatment $\times$ Post | -9.14<br>(5.55)                                | .116<br>(5.52)        | -6.04<br>(2.9)                                                                           | -27.9<br>(6.84)          | 7.21<br>(8.14)                                          | -5.89<br>(8.9)                                          | -4.14<br>(5.16)                                       | -.17<br>(3.79)                                            | -1.54<br>(2.05)                                                 | .417<br>(11.2)                            |
| IV Coefficient          | -12.2<br>(7.09)                                | .155<br>(6.91)        | -8.07<br>(3.65)                                                                          | -37.2<br>(8.01)          | 9.64<br>(10.1)                                          | -7.87<br>(11.2)                                         | -5.53<br>(6.48)                                       | -.227<br>(4.75)                                           | -2.06<br>(2.56)                                                 | .557<br>(14)                              |
| Baseline Mean           | 41.5                                           | 60.9                  | 31.1                                                                                     | 47.2                     | 130.6                                                   | 79.8                                                    | 71.7                                                  | 22.7                                                      | 19.1                                                            | 67.6                                      |
| Percent Change          | -.294<br>(.171)                                | .003<br>(.113)        | -.260<br>(.117)                                                                          | -.789<br>(.170)          | .074<br>(.078)                                          | -.099<br>(.141)                                         | -.077<br>(.090)                                       | -.01<br>(.209)                                            | -.108<br>(.134)                                                 | .008<br>(.207)                            |

  

| (b) Any Spending        |                                                |                       |                                                                                          |                          |                                                         |                                                         |                                                       |                                                           |                                                                 |                                           |
|-------------------------|------------------------------------------------|-----------------------|------------------------------------------------------------------------------------------|--------------------------|---------------------------------------------------------|---------------------------------------------------------|-------------------------------------------------------|-----------------------------------------------------------|-----------------------------------------------------------------|-------------------------------------------|
|                         | (1)<br>Infectious<br>and parasitic<br>Diseases | (2)<br>Neo-<br>plasms | (3)<br>Endocrine;<br>nutritional;<br>and metabolic<br>Diseases and<br>immunity disorders | (4)<br>Mental<br>Illness | (5)<br>Diseases<br>of the<br>circu-<br>latory<br>system | (6)<br>Diseases<br>of the<br>respi-<br>ratory<br>system | (7)<br>Diseases<br>of the<br>dige-<br>stive<br>system | (8)<br>Diseases<br>of the<br>genito-<br>urinary<br>system | (9)<br>Diseases<br>of the<br>skin and<br>subcutaneous<br>tissue | (10)<br>In-<br>jury<br>and poiso-<br>ning |
| Treatment $\times$ Post | .0001<br>(.0006)                               | .0003<br>(.0003)      | -.002<br>(.0006)                                                                         | -.004<br>(.001)          | .0006<br>(.0009)                                        | -.0007<br>(.001)                                        | -.0008<br>(.0006)                                     | -.00003<br>(.0005)                                        | -.0004<br>(.0004)                                               | 0.000008<br>(.0006)                       |
| IV Coefficient          | .0002<br>(.0007)                               | .0004<br>(.0003)      | -.002<br>(.0007)                                                                         | -.006<br>(.001)          | .0008<br>(.001)                                         | -.001<br>(.001)                                         | -.001<br>(.0008)                                      | -.00004<br>(.0007)                                        | -.0005<br>(.0005)                                               | .00001<br>(.0008)                         |
| Baseline Mean           | .004                                           | .005                  | .006                                                                                     | .009                     | .016                                                    | .01                                                     | .01                                                   | .005                                                      | .004                                                            | .007                                      |
| Percent Change          | .047<br>(.173)                                 | .086<br>(.064)        | -.402<br>(.123)                                                                          | -.637<br>(.127)          | .048<br>(.070)                                          | -.098<br>(.122)                                         | -.105<br>(.077)                                       | -.009<br>(.139)                                           | -.134<br>(.126)                                                 | .002<br>(.110)                            |

**Note:** Table shows reduced form and instrumental variable estimates for the top 10 most common Clinical Classification Software (CCS) groups of diagnoses. The first row shows estimates of control-treatment differences from estimating the pooled version of the reduced form specification in Equation (1) and the second row shows estimates of the impact of Medicaid managed care from estimating our instrumental variable specification, pooling over the entire post-period. We control for service area by quarter fixed effects. Standard errors are clustered at the county level. For more details, see Section 4. ( $N = 643,751$  beneficiary-quarters.)

Appendix Table A16: Outpatient Spending and Prescriptions

|                                     | (1)<br>Adjusted<br>Spending<br>Total | (2)<br>Adjusted<br>Spending<br>Total | (3)<br>Adjusted<br>Spending<br>No Rx Match | (4)<br>Adjusted<br>Spending<br>No Rx Match | (5)<br>Adjusted<br>Spending<br>Rx Match | (6)<br>Adjusted<br>Spending<br>Rx Match |
|-------------------------------------|--------------------------------------|--------------------------------------|--------------------------------------------|--------------------------------------------|-----------------------------------------|-----------------------------------------|
| Treatment $\times$ Post             | 265<br>(43)                          |                                      | 172<br>(42)                                |                                            | 93<br>(7)                               |                                         |
| Treatment $\times$ Post (2007-2008) |                                      | 123<br>(36)                          |                                            | 71<br>(34)                                 |                                         | 52<br>(5)                               |
| Treatment $\times$ Post (2009-2010) |                                      | 374<br>(60)                          |                                            | 240<br>(59)                                |                                         | 134<br>(10)                             |
| IV Coefficient                      | 354<br>(53)                          | 343<br>(57)                          | 230<br>(52)                                | 215<br>(56)                                | 124<br>(7)                              | 128<br>(8)                              |
| Baseline Mean                       | 1,549                                | 1,549                                | 1,396                                      | 1,396                                      | 153                                     | 153                                     |
| Percent Change                      | .229                                 | .221                                 | .165                                       | .154                                       | .808                                    | .834                                    |
| Percent Change (SE)                 | (.034)                               | (.037)                               | (.037)                                     | (.04)                                      | (.046)                                  | (.053)                                  |
| Individual Fixed Effects            | X                                    | X                                    | X                                          | X                                          | X                                       | X                                       |

**Notes:** Table shows reduced form and instrumental variable estimates for outpatient spending. Columns (1) and (2) show results for total outpatient days, columns (3) and (4) show results for outpatient days when no prescription is written, and columns (5) and (6) show results for outpatient days when a prescription is written. For each outcome, the first column shows estimates of control-treatment differences from estimating the pooled version of the reduced form specification in Equation (1) and estimates of the impact of Medicaid managed care from estimating our instrumental variable specification, pooling over the entire post-period. The second column shows reduced form and instrumental variable estimates, when the post-period is broken into two separate periods, 2007-2008 and 2009-2010. In the second and fourth columns we estimate the IV coefficient using the two separate treatment  $\times$  post interaction terms as instruments. We control for service area by quarter fixed effects. Standard errors are clustered at the county level. For more details, see Section 4. ( $N = 643,751$  beneficiary-quarters.)

## B Medicaid and SSI

The majority of adults with disabilities enrolled in Medicaid are eligible for Medicaid due to their enrollment in the Supplemental Security Income (SSI) program. The SSI program is one of the largest welfare programs in the United States, providing monthly payments to more than 8.2 million disabled or elderly beneficiaries in December 2017. Of these, 4.8 million were adults with disabilities between the ages of 18 and 64, and the average monthly payment for this group was \$564.34 ([Social Security Administration, 2018](#)). For the non-elderly, eligibility for SSI is based on medical criteria as well as income and asset tests. SSI has the same medical eligibility criteria for adults as the Social Security Disability Insurance (SSDI) program, but does not share SSDI's work history requirements. Approximately one-third of SSI beneficiaries are also enrolled in the SSDI program because they have sufficient prior work history for SSDI but low enough income to qualify for SSI as well.

SSI beneficiaries are categorically eligible for Medicaid in most states, meaning that they can enroll in Medicaid without having to apply separately.<sup>1</sup> SSDI beneficiaries are categorically eligible for Medicare, making those SSI beneficiaries who also qualify for SSDI dually eligible for both Medicaid and Medicare. In Texas (as well as in most other states where private provision has been rolled out to adults with disabilities), dually eligible beneficiaries were excluded from the shift to private managed care plans. Thus, our analysis focuses on the two-thirds of SSI beneficiaries who were not also eligible for SSDI.

Cash benefit payments for disabled SSI beneficiaries quadrupled between 1990 (\$12.2 billion) and 2017 (\$48.2 billion) ([Social Security Administration, 2018](#)); however, these expenditures are dwarfed by Medicaid expenditures for this population—\$187 billion in 2014 ([Kaiser Family Foundation, 2014a](#)). Adults with disabilities are the most expensive group in Medicaid, with per capita spending equal to \$16,859 in 2014, almost five times higher than per capita spending for adults without disabilities (\$3,278) ([Kaiser Family Foundation, 2014b](#)). One reason for this higher spending profile is that SSI beneficiaries disproportionately qualify for the program due to mental disorders: 57.4% of SSI beneficiaries qualified for SSI due to a mental disorder, with intellectual disabilities (19% of beneficiaries who qualify due to a mental disorder) being the largest sub-category, followed by mood disorders (16%), and schizophrenic and other psychotic disorders (8.9%). After mental disorders, the next largest categories are musculoskeletal disabilities (13%) and nervous system disabilities (7.7%) ([Duggan, Kearney and Rennane, 2015](#)). Thus, this population differs greatly from the average non-disabled Medicaid beneficiary and even from the typical SSDI beneficiary, in its high prevalence of mental illness, indicating a high level of need for mental healthcare. Also contributing to high costs is the fact that individuals in this population suffer from multiple serious health problems. This suggests that (1) the tools of managed care may be particularly effective for this group and (2) strict rationing in public FFS Medicaid programs (such as Texas's three-drug cap) is likely to be binding for this group and could potentially have detrimental (and observable) health effects. In Appendix Figure B1, we present the prevalence of a variety of clinical conditions by age.

---

<sup>1</sup>10 states have stricter criteria, while 7 states require a separate application but have no additional criteria. In Texas, Medicaid eligibility is automatic for SSI beneficiaries

Appendix Figure B1: Comorbidities By Age

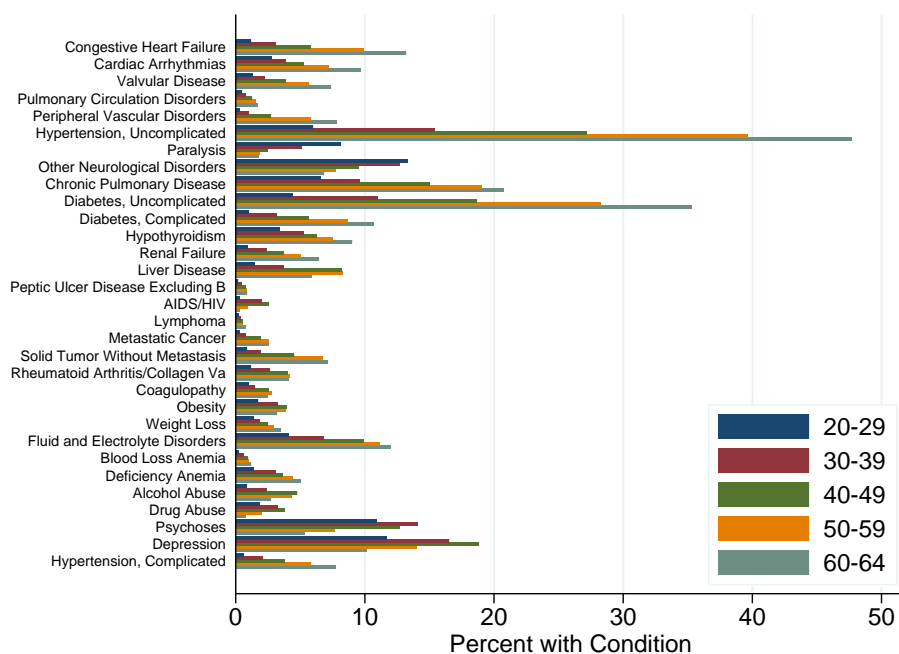

**Note:** Figure shows the distribution of the 31 components of the Elixhauser Comorbidity Index by age group. ( $N = 189,935$  beneficiary-years.)

## C Price Variation Across Managed Care Plan Carriers

The Texas outpatient data includes information on actual cost amounts for both the public *and the private* programs. Specifically, the data contains the negotiated amounts actually paid to providers by the public or private plans at the claim-line level. These actual provider payment amounts are available for all public Medicaid claims, as well as for about 80% of all private Medicaid plan claims. In this section, we examine the variation in the observed rates across the four carriers (EverCare, Amerigroup, Molina, and Superior HealthPlan) that the state contracted with in 2009 and 2010, the years during which Medicaid managed care was already rolled out and for which we have a crosswalk from plan identifiers in the data to carrier names.

We examine the sample of outpatient managed care claims for 2009 and 2010 for which the payment from plans to providers is available, which comprises 80% of managed care claims. Furthermore, we restrict to the 99.9% of claims that are associated with a plan and carrier that we observe as a plan contracted by the state of Texas in the actuarial reports. To decrease noise in prices, we exclude claims that have a quantity of service provided different from 1 and claims that have a procedure modifier code. On this final sample of outpatient managed care claims, we estimate the following regression:

$$\log(p_{ichpt}) = \gamma_c + \delta_h + \psi_p + \tau_t + \varepsilon_{ichpt} \quad (1)$$

where  $i$  indexes individuals,  $c$  indexes carriers,  $h$  indexes providers,  $p$  indexes procedures, and  $t$  indexes time;  $\gamma_c$  is a set of carrier fixed effects,  $\delta_h$  is a set of provider fixed effects,  $\psi_p$  is a set of procedure fixed effects, and  $\tau_t$  is a set of year fixed effects. We define procedures as unique combinations of procedure codes and place of service codes. We cluster standard errors at the carrier level. Figure C1 shows the estimated carrier fixed effects. Relative to the omitted carrier, Evercare, Amerigroup has on average 19% lower prices, Molina has on average 9% lower prices, and Superior has on average 4% higher prices, though these latter two differences are not statistically significant.

Appendix Figure C1: Distribution of Estimated Carrier Fixed Effects

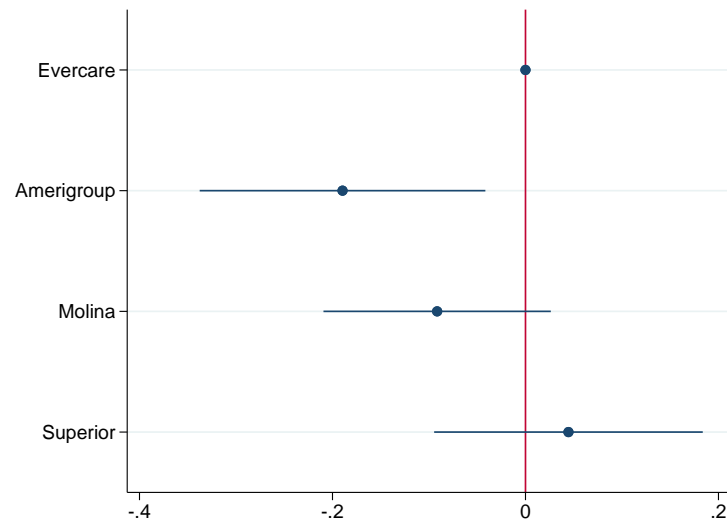

**Note:** Figure shows the distribution of estimated carrier fixed effects from estimating Equation (1). Standard errors are clustered at the carrier level. ( $N = 2,265,378$  outpatient managed care claims.)

## D Border Zip Code Analysis

In this appendix we replicate our main results limiting to border zip codes. The motivation for this analysis is that one might be concerned that our treatment counties are more urban than control counties and urban and rural counties may have been differentially impacted by potential shocks that occurred around the time of our treatment (February 2007). Focusing on border zip codes may make control and treatment counties even more similar. Border zip codes are defined as zip codes in a control county that are within 25 miles of a treatment county and zip codes in a treatment county that are within 25 miles of a control county. Distance is measured as great-circle distance calculated using the Haversine formula based on internal points in zip codes.<sup>2</sup>

Appendix Figure D1 shows a map of zipcodes in Texas. Control and treatment counties are highlighted in shades of blue and shades of red, respectively, separating border and non-border zipcodes.

Appendix Table D1 replicates Table 1, limiting to the border zipcodes.

Appendix Table D2 replicates Table 2, limiting to the border zipcodes. For each primary outcome (healthcare spending, inpatient spending, drug spending, outpatient spending), we report coefficients from four regressions. The first two regressions include individual fixed effects while the second two regressions do not. The first and third regressions include an interaction between an indicator for residing in a treatment county (“Treatment”) and an indicator for the quarter being after February 2007 (“Post”), the month in which mandated enrollment in private Medicaid plans began in Texas. The second and fourth columns break the “post” period into two periods, an “early-post” period (2007-2008) and a “late-post” period (2009-2010). For each regression specification we report both reduced form and IV coefficients. Reduced form coefficients should be interpreted as the effect of a county-level private-plan enrollment mandate on the outcome, allowing take-up of private plans to be incomplete even under mandated enrollment. IV coefficients should be interpreted as the difference in the outcome in the public Medicaid program vs. in a private plan for the average beneficiary who was induced by the mandate to enroll in a private plan. We highlight that our main results remain quite similar on this restricted sample.

---

<sup>2</sup>Files with distances between zip codes are available at <https://www.nber.org/data/zip-code-distance-database.html>.

Appendix Figure D1: Texas ZIP Codes

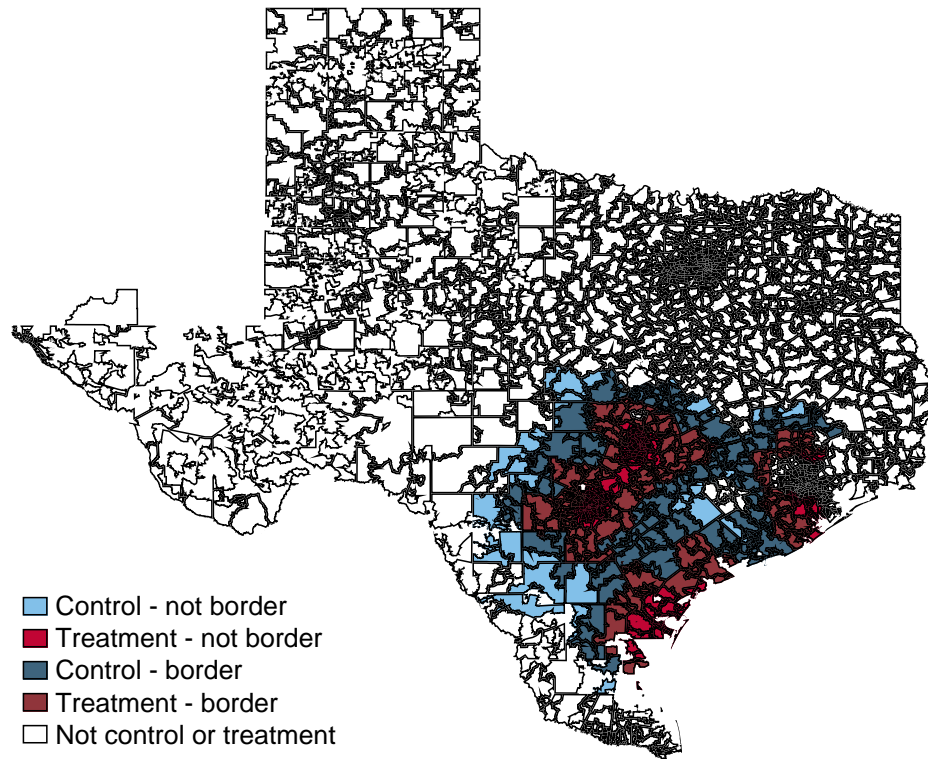

**Note:** Figure shows the map of zip codes in Texas. For our analysis of zip codes we classify zip codes within the control and treatment counties into border and non-border zip codes. Border zip codes are zip codes in control counties within 25 miles of a treatment zip code and zip codes in treatment counties within 25 miles of a control zip code. Not border zip codes are all the other zip codes in control and treatment counties. Distance is measured as great-circle distance calculated using the Haversine formula based on internal points in zip codes.

Appendix Table D1: Summary Statistics (Zipcodes)

|                                            | Control | Treatment |
|--------------------------------------------|---------|-----------|
| Average quarterly healthcare spending 2004 | 2,662   | 2,912     |
| Average quarterly inpatient spending 2004  | 722     | 745       |
| Average quarterly outpatient spending 2004 | 1,360   | 1,531     |
| Average quarterly Rx spending 2004         | 580     | 636       |
| Age 20 to 24                               | .095    | .111      |
| Age 25 to 29                               | .078    | .083      |
| Age 30 to 34                               | .080    | .080      |
| Age 35 to 39                               | .084    | .086      |
| Age 40 to 44                               | .099    | .111      |
| Age 45 to 49                               | .130    | .124      |
| Age 50 to 54                               | .142    | .130      |
| Age 55 to 59                               | .162    | .149      |
| Age 60 to 64                               | .130    | .126      |
| Female                                     | .578    | .560      |
| Male                                       | .422    | .441      |
| Heart Disease                              | .339    | .327      |
| Diabetes                                   | .198    | .214      |
| HIV/AIDS                                   | .010    | .090      |
| Cancer                                     | .052    | .052      |
| Rheumatoid Arthritis                       | .036    | .036      |
| Obesity                                    | .028    | .029      |
| Substance Use                              | .052    | .051      |
| Mental Illness                             | .212    | .201      |
| N recipients Jan 2004                      | 6,092   | 8,710     |
| N recipients Dec 2010                      | 7,191   | 11,548    |
| N pre-period recipient months              | 234,355 | 339,409   |
| N post-period recipient months             | 315,790 | 503,044   |

**Note:** Table shows summary statistics for border zipcodes in control and treatment counties. For our analysis of zipcodes we classify zipcodes within the control and treatment counties into border and not border zipcodes. Border zipcodes are zipcodes in control counties within 25 miles of a treatment zipcode and zipcodes in treatment counties within 25 miles of a control zipcode. Not border zipcodes are all the other zipcodes in control and treatment counties. Distance is measured as great-circle distance calculated using the Haversine formula based on internal points in zipcodes.

Appendix Table D2: Main Outcomes (Border Zipcodes)

|                                     | (1)                 | (2)            | (3)           | (4)           | (5)            | (6)            | (7)            | (8)            | (9)                 | (10)           | (11)           | (12)           | (13)               | (14)            | (15)            | (16)            |
|-------------------------------------|---------------------|----------------|---------------|---------------|----------------|----------------|----------------|----------------|---------------------|----------------|----------------|----------------|--------------------|-----------------|-----------------|-----------------|
|                                     | Healthcare Spending |                |               |               | Rx Spending    |                |                |                | Outpatient Spending |                |                |                | Inpatient Spending |                 |                 |                 |
| Treatment $\times$ Post             | 477<br>(81.8)       |                | 516<br>(70.3) |               | 151<br>(28.7)  |                | 145<br>(23.1)  |                | 391<br>(52)         |                | 388<br>(49.1)  |                | -65.2<br>(32.3)    |                 | -17.2<br>(26.7) |                 |
| Treatment $\times$ Post (2007-2008) |                     | 241<br>(72.1)  |               | 327<br>(58.6) |                | 89.9<br>(23.1) |                | 82<br>(24)     |                     | 200<br>(50)    |                | 254<br>(41.6)  |                    | -48.4<br>(35.6) |                 | -8.5<br>(27.2)  |
| Treatment $\times$ Post (2009-2010) |                     | 718<br>(93.6)  |               | 645<br>(93.5) |                | 219<br>(38.9)  |                | 187<br>(27.3)  |                     | 556<br>(65.9)  |                | 469<br>(63.7)  |                    | -56.8<br>(33)   |                 | -10.9<br>(34)   |
| IV Coefficient                      | 611<br>(95.1)       | 622<br>(87.7)  | 778<br>(110)  | 762<br>(110)  | 194<br>(33.3)  | 199<br>(34.2)  | 219<br>(35.3)  | 213<br>(36.5)  | 500<br>(60.6)       | 489<br>(63)    | 585<br>(74.8)  | 564<br>(75.1)  | -83.3<br>(38.8)    | -66.3<br>(35.2) | -25.9<br>(39.8) | -14.8<br>(38.1) |
| Baseline Mean                       | 2,781               | 2,781          | 2,781         | 2,781         | 630            | 630            | 630            | 630            | 1,477               | 1,477          | 1,477          | 1,477          | 673                | 673             | 673             | 673             |
| Percent Change                      | .220<br>(.034)      | .224<br>(.032) | .28<br>(.04)  | .274<br>(.04) | .308<br>(.053) | .316<br>(.054) | .347<br>(.056) | .337<br>(.058) | .339<br>(.041)      | .331<br>(.043) | .396<br>(.051) | .382<br>(.051) | -.124<br>(.058)    | -.098<br>(.052) | -.038<br>(.059) | -.022<br>(.057) |
| Individual Fixed Effects            | X                   | X              |               |               | X              | X              |                |                | X                   | X              |                |                | X                  | X               |                 |                 |

**Note:** Table shows reduced form and instrumental variable estimates for the main outcomes using only border zipcodes. For each outcome, the first and third columns show estimates of control-treatment differences from estimating the pooled reduced form specification in Equation (1) and estimates of the impact of Medicaid managed care from estimating our instrumental variable specification, pooling over the entire post-period. The second and fourth columns show reduced form and instrumental variable estimates, when the post-period is broken into two separate periods, 2007-2008 and 2009-2010. In the second and fourth columns we estimate the IV coefficient using the two separate treatment  $\times$  post interaction terms as instruments. For more details, see Section 4. ( $N = 369,823$  beneficiary-quarters.)

## E Long-Term Care Spending

In this appendix, we present results related to spending on and utilization of institutional long-term care services. Use of these services is not uncommon among disabled Medicaid beneficiaries. However, beneficiaries using institutional long-term care are exempted from the STAR+Plus program, suggesting that the roll out of STAR+Plus should not have much effect on utilization of these services. Further, our data do not provide the same detailed information about utilization of these services that they provide for other types of services discussed in the paper. Indeed, we only observe annual summary measures of spending and utilization for institutional long-term care, preventing us from performing the same quarterly analyses we perform for other types of services. For these reasons, we present these results separately here in this appendix.

Figure E1 and Table E1 present results of our analyses of the effects of the reform on long-term care spending. We estimate the same regressions as we estimate for other outcomes but at the annual instead of the quarterly level. The event study presented in Figure E1 suggests no effect of the reform on long-term care spending, with the difference in spending between treatment and control counties remaining roughly constant over the period before and after the reform. However, standard errors are quite large, especially toward the end of the sample period. The results in Table E1 provide a similar picture: In the regressions with individual fixed effects (our preferred specification), coefficients are small and statistically insignificant. Regressions without individual fixed effects produce larger coefficients but are (1) subject to the caveat that changes in composition could potentially explain these results (though not the results with individual fixed effects) and (2) still statistically insignificant in all cases but one, and the single significant case (the “early-post” coefficient in column (4)) is only marginally significant at the 10% level. Further, in results not presented here, the coefficients on total healthcare spending from Table 2 change only slightly when including long-term care spending as part of total healthcare spending, indicating that our omission of long-term care spending has no material effect on the conclusions of the paper.

Taken together, these results suggest no effect of the reform on long-term care spending. This is not surprising, given that individuals using institutional long-term care are exempted from the STAR+Plus program.

Appendix Figure E1: Long-term Care Spending

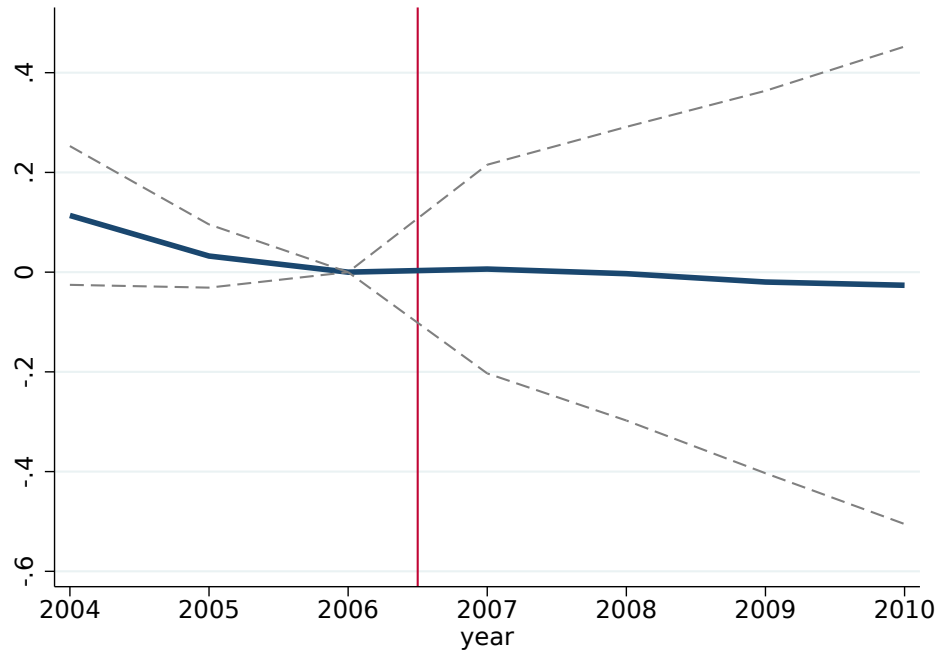

**Note:** Figure shows control-treatment differences in long-term care spending in percent terms relative to the treatment mean in the pre-period. These coefficients are from estimating the event study difference-in-differences specification in Equation (1), including individual fixed effects. For more details, see Section 4. ( $N = 189,935$  beneficiary-years.)

Appendix Table E1: Long-term Care Spending

|                                     | (1)<br>Long-term Care<br>Spending | (2)<br>Long-term Care<br>Spending | (3)<br>Long-term Care<br>Spending | (4)<br>Long-term Care<br>Spending |
|-------------------------------------|-----------------------------------|-----------------------------------|-----------------------------------|-----------------------------------|
| Treatment $\times$ Post             | -146<br>(556)                     |                                   | -421<br>(257)                     |                                   |
| Treatment $\times$ Post (2007-2008) |                                   | -117<br>(453)                     |                                   | -292<br>(167)                     |
| Treatment $\times$ Post (2009-2010) |                                   | -193<br>(721)                     |                                   | -537<br>(343)                     |
| IV Coefficient                      | -209<br>(626)                     | -219<br>(653)                     | -786<br>(485)                     | -807<br>(501)                     |
| Baseline Mean                       | 3,084                             | 3,084                             | 3,084                             | 3,084                             |
| Percent Change                      | -.068<br>(.203)                   | -.071<br>(.212)                   | -.255<br>(.157)                   | -.262<br>(.162)                   |
| Individual Fixed Effects            | X                                 | X                                 |                                   |                                   |

**Note:** Table shows reduced form and instrumental variable estimates for long-term care spending. The first row shows estimates of control-treatment differences from estimating the pooled version of the reduced form specification in Equation (1) and the second row shows estimates of the impact of Medicaid managed care from estimating our instrumental variable specification, when the post-period is broken into two separate periods, 2007-2008 and 2009-2010. We estimate the IV coefficient using the two separate treatment  $\times$  post interaction terms as instruments. We control for service area by year fixed effects. Standard errors are clustered at the county level. For more details, see Section 4. ( $N = 189,935$  beneficiary-years.)

## F Mortality and Employment Outcomes

In this section, we examine indicators of beneficiary health and functional capacity, including death, employment, and the suspension of SSI benefits using the SSA's Disability Analysis File (DAF). The DAF contains monthly administrative records on the universe of SSI and SSDI beneficiaries. We isolate adults (21-64) enrolled only in the SSI program during our sample period. We only observe Medicaid and Medicare eligibility and county of residence but not private vs. public plan enrollment in the SSA data. Mortality is defined as a binary indicator for whether a beneficiary died in a given quarter. Employment is defined as a binary indicator for whether the beneficiary had positive earnings in a given quarter. SSI suspension is defined as a binary indicator for whether a beneficiary's SSI benefits were suspended due to work in a given quarter. Mortality provides a direct measure of beneficiary health. Employment and SSI suspensions provide indirect measures of functional capacity, with the assumption being that take-up of employment or the suspension of benefits due to work indicate improvements in functional capacity and overall well-being.

Regression specifications follow Equation (1) (intent-to-treat estimator), as we do not observe managed care plan enrollment in the SSA data and therefore cannot account for incomplete take-up of managed care as well as the accompanying relaxation of the drug cap in an instrumental variables framework.<sup>3</sup> Regression results are presented in Appendix Figure F1 and Appendix Table F1. Odd columns pool all years in the post-period, and even columns split the post-period into an early and a late period. Coefficients generally go in a direction consistent with overall improvements in health and functional capacity, with managed care plus relaxation of the drug cap leading to long-run reductions in mortality, increases in employment, and more suspensions of benefits due to work. However, none of the coefficients are statistically significantly different from zero, and confidence intervals are quite wide. For mortality, we get a point estimate of -0.06 percentage points, or a reduction of 6% relative to the baseline mean quarterly mortality rate of 1%. However, the 95% confidence interval ranges from a mortality reduction of 0.18 percentage points (18%) to a mortality increase of 0.05 percentage points (5%), implying that we can only rule out mortality increases larger than 5%. For employment, we can only rule out reductions larger than 0.32 percentage points (6%), and for suspensions we can only rule out reductions larger than 0.21 percentage points (15%). We thus conclude that while the signs on these coefficients are all consistent with improvements in health and functional capacity, they are too noisy to lead to any firm conclusions.

---

<sup>3</sup>We also do not include individual fixed effects, as this is not appropriate with the mortality and suspension outcomes, which are absorbing states.

Appendix Figure F1: Other Outcomes

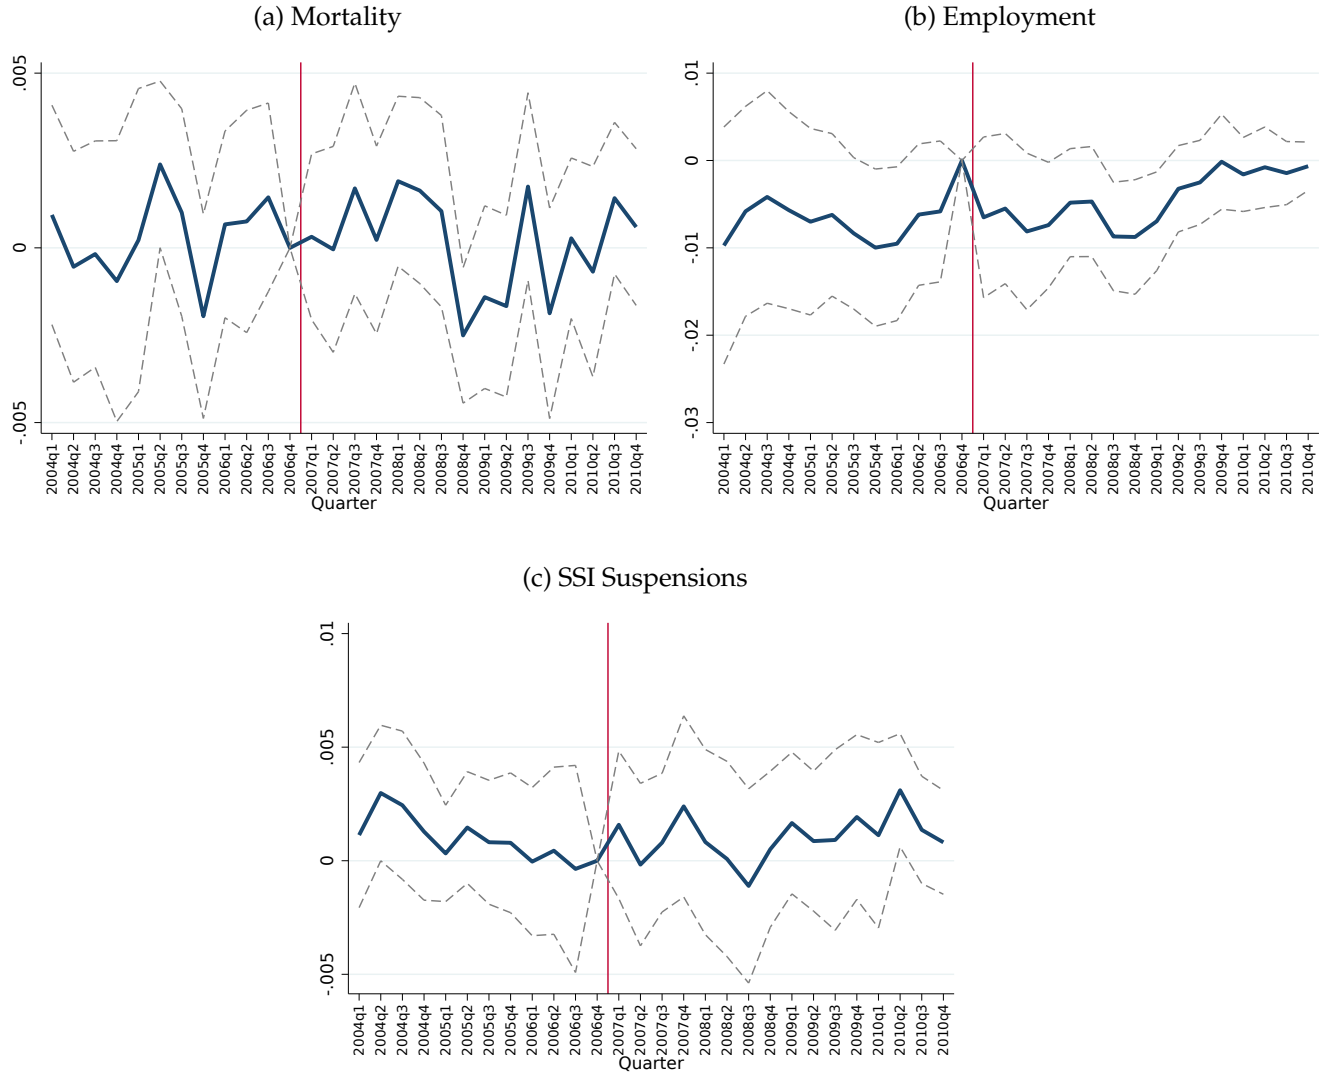

**Note:** Figure shows control-treatment differences in mortality, employment, and SSI suspensions. These coefficients are from estimating the event study difference-in-differences specification in Equation (1). For more details, see Section 4. ( $N = 1,123,706$  beneficiary-quarters.)

Appendix Table F1: Other Outcomes

|                                     | (1)       | (2)      | (3)        | (4)     | (5)             | (6)     |
|-------------------------------------|-----------|----------|------------|---------|-----------------|---------|
|                                     | Mortality |          | Employment |         | SSI Suspensions |         |
| Treatment $\times$ Post             | -0.0003   |          | 0.003      |         | 0.00008         |         |
|                                     | (0.0005)  |          | (0.004)    |         | (0.001)         |         |
| Treatment $\times$ Post (2007-2008) |           | 0.00008  |            | 0.0003  |                 | -0.0004 |
|                                     |           | (0.0007) |            | (0.003) |                 | (0.001) |
| Treatment $\times$ Post (2009-2010) |           | -0.0006  |            | 0.005   |                 | 0.0005  |
|                                     |           | (0.0006) |            | (0.004) |                 | (0.001) |
| Baseline Mean                       | 0.010     | 0.010    | 0.051      | 0.051   | 0.014           | 0.014   |

**Note:** Table shows reduced form estimates for mortality, employment, and SSI suspension. For each outcome, the first column shows estimates of control-treatment differences from estimating the pooled version of the reduced form specification in Equation (1), pooling over the entire post-period. The second column shows reduced form estimates, when the post-period is broken into two separate periods, 2007-2008 and 2009-2010. We control for service area by quarter fixed effects. Standard errors are clustered at the county level. For more details, see Section 4. ( $N = 1,123,706$  beneficiary-quarters.)

## G Exploration of Alternative Explanations for Increase in Drug Utilization

In this appendix we explore two alternative explanations for the increase in drug utilization we observe after the introduction of the STAR+Plus program. First, we consider the possibility that the increase in drug utilization occurred because MMC plans who were not responsible for drug spending encouraged utilization of drugs with the hope of offsetting non-drug medical expenditures. Second, we consider the possibility that the increase in drug utilization was a side-effect of the roll out of managed care for non-drug services. The evidence we present here suggests that these were not the driving factors behind the increase in drug utilization. Instead, as we discuss in Section 7, the evidence suggests that the relaxation of the drug cap was the driving factor.

**Carve-Out of Prescription Drugs** Even though the relaxation of the drug cap appears to be the main mechanism through which the Texas reform impacted drug utilization, the fact that drugs were carved out of private managed care plan contracts could also play a role; recall that drugs were paid for by the public program for all beneficiaries in all years, even for beneficiaries enrolled in a private plan. With this carve-out, plans had no incentive to reduce drug spending, and may have instead been incentivized to drive up drug utilization, given potential drug-driven medical offsets (Chandra, Gruber and McKnight, 2010; Starc and Town, 2020), including the inpatient offsets we document in Sections 6 and 7. If drugs had been “carved-in” or included in managed care plan contracts, plans may have chosen to ration access to drugs more aggressively than they did in the presence of the carve-out, possibly limiting the effect of relaxing the public drug cap.

To investigate this possibility, we leverage the fact that drugs were carved in to managed care plan contracts in Texas starting in 2012. Our detailed claims and enrollment data ends in 2010, so we cannot use it to study the effects of the carve-in of prescription drugs. Instead, we follow Dranove, Ody and Starc (2021) and use publicly available aggregate data describing prescription drug utilization and spending in Texas’s Medicaid program (both public and private plans) over time.<sup>4</sup> In Appendix Figure G1, we document per-enrollee prescription drug utilization and expenditure levels in Texas Medicaid around the 2012 integration of drug services into private Medicaid contracts. The figures show no meaningful change in any of these measures of drug use within Texas Medicaid following the carve-in. In the figure, we also show the same set of outcomes for Arkansas as a reference and control, as it is the neighboring state with the most similar pre-2012 trends in drug utilization.

These results provide suggestive evidence that the prescription drug carve-out is relatively inconsequential for patterns of drug utilization in Texas. This is consistent with results from Dranove, Ody and Starc (2021) who show that, when a large set of states carve prescription drug benefits into managed care plan contracts, patterns of utilization change in ways that are similar to states which privatized medical and drug benefits at the same time. While they do find changes overall spending, these appear driven by changes in unit prices rather than by changes in utilization. The implication of this body of evidence is that there seems to be little consequence of including or excluding drugs from managed care plan contracts.

---

<sup>4</sup>The Medicaid State Drug Utilization Data is available online from <https://www.medicaid.gov/medicaid/prescription-drugs/state-drug-utilization-data/index.html>.

In other words, the evidence suggests that the effect of shifting to managed care on drug utilization would have been comparable irrespective of whether drugs were carved in or carved out, at the time of the shift.

**Shift to Private Provision of Medical Benefits** While the analysis so far suggests that the overall effect of the Texas reform on drug utilization came partly through the accompanying relaxation of drug caps, we cannot completely rule out the alternative mechanism of the drug effect instead coming through private provision's effect on patterns of medical care. For example, it is possible that the activities of the private Medicaid plans related to outpatient care (i.e. care management) naturally led to increased levels of drug utilization. Specifically, we showed that private provision led to increased use of outpatient care in Texas, and it is possible that just seeing the doctor more could lead to higher levels of drug utilization.

However, it seems unlikely that any care management activities would *only* affect utilization on the margin of taking three or more drugs, the margin we showed to be by far the most important for the drug effect we estimate. That said, our analysis cannot entirely rule out comparable drug effects, even absent the lifting of the public drug cap under privatization. To make this point, we must instead rely on the null result for drugs in our work studying the shift to managed care in New York, which had no drug cap ([Layton et al., 2019](#)).

Appendix Figure G1: Impact of the Prescription Drug Carve-in

(a) Number of Prescriptions

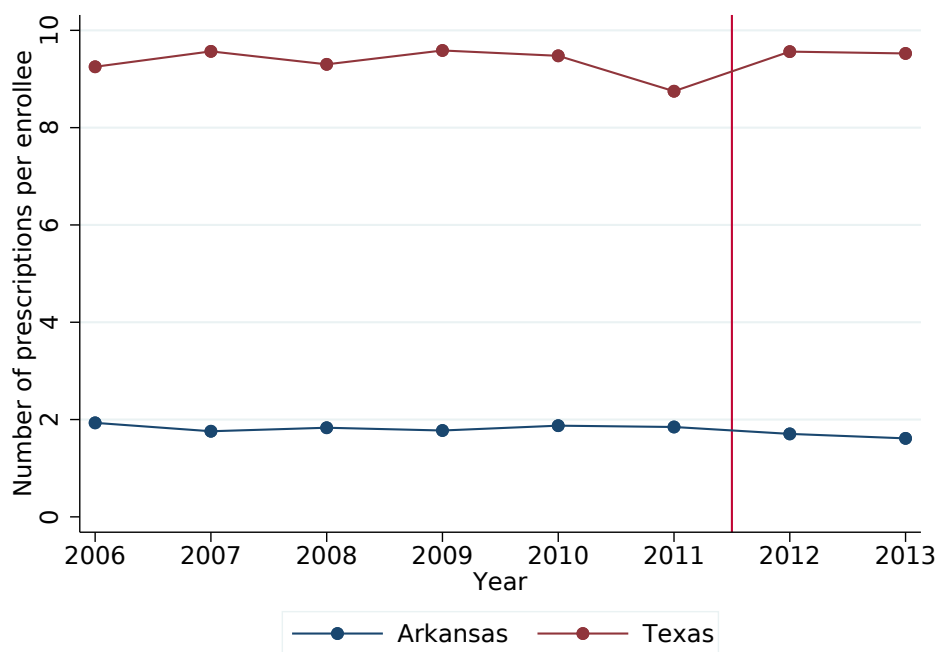

(b) Spending

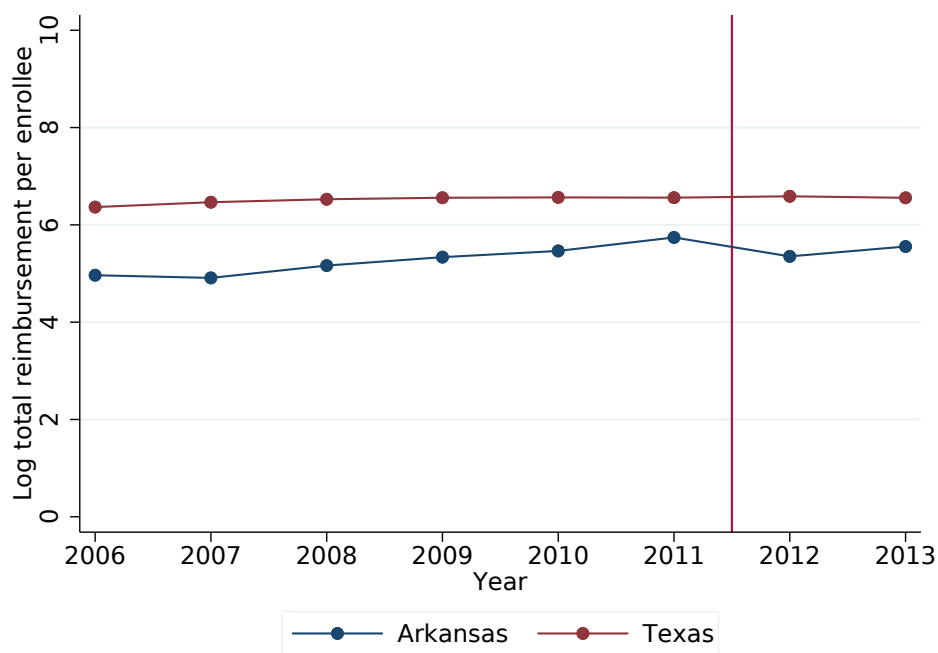

**Note:** Figure shows the number of prescriptions and the amount of spending per enrollee in Texas and Arkansas before and after Texas carved prescription drugs into its managed care contracts in 2012. The data displayed here come from the publicly available Medicaid State Drug Utilization Data. For more details, see Appendix G. ( $N = 64$  state-years.)

## H Price Analysis

Appendix Figure H1: Prices Under FFS and MMC

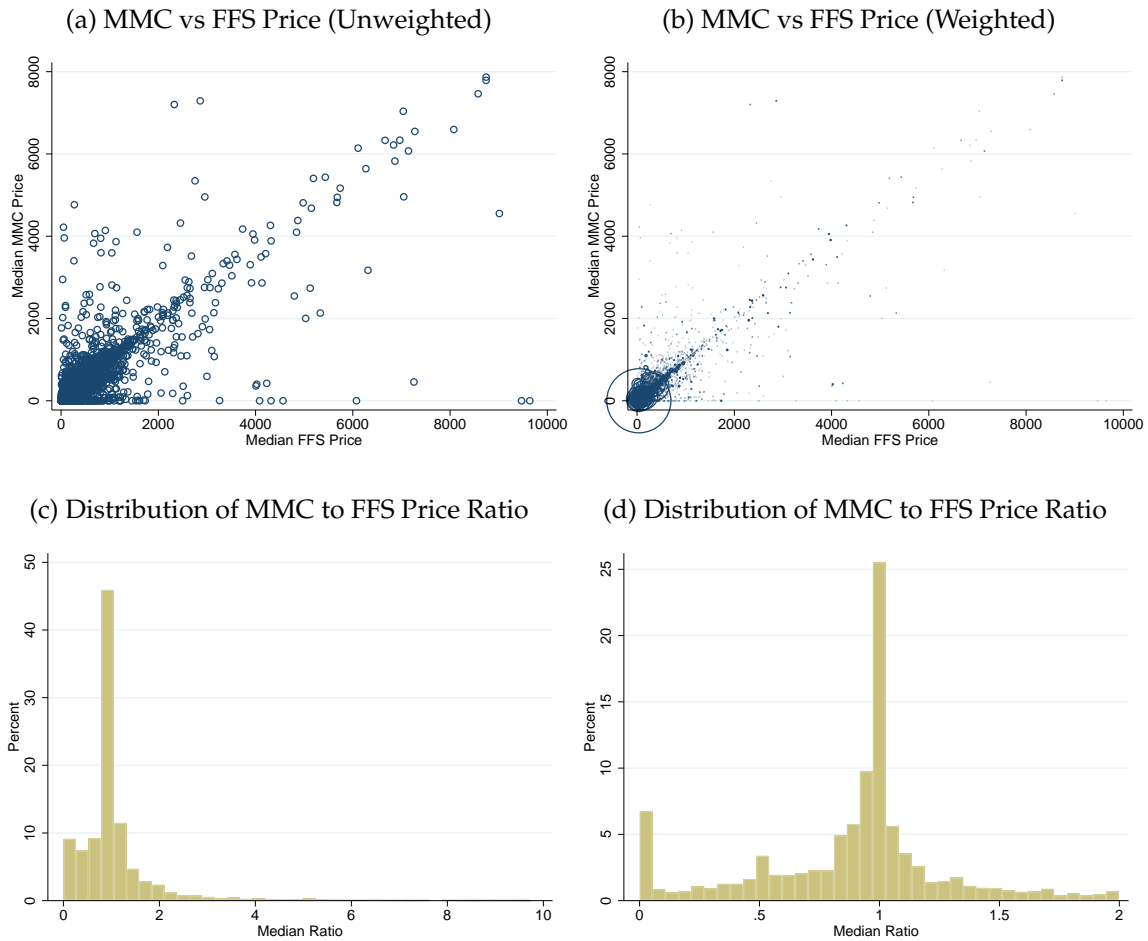

**Note:** Figure shows how MMC and FFS prices compare in 2010, the final year in our data. For each procedure that we observe both under fee-for-service (FFS) Medicaid and Medicaid managed care (MMC), we compute the median price under FFS and under MMC. Panel (a) shows an unweighted scatterplot of the median MMC price vs the median FFS price, censored at \$10,000 for readability. Panel (b) shows a weighted (by frequency under FFS) scatterplot of the median MMC price vs the median FFS price, censored at \$10,000 for readability. Panel (c) shows a histogram of the distribution of the ratio of the median MMC price to the median FFS price, censored at 10 for readability. Panel (d) shows a histogram of the distribution of the ratio of the median MMC price to the median FFS price, censored at 2 for readability. For more details, see Section 7. ( $N = 6,053$  unique procedure codes.)

Appendix Figure H2: Distribution of Procedure-Specific Price Differences

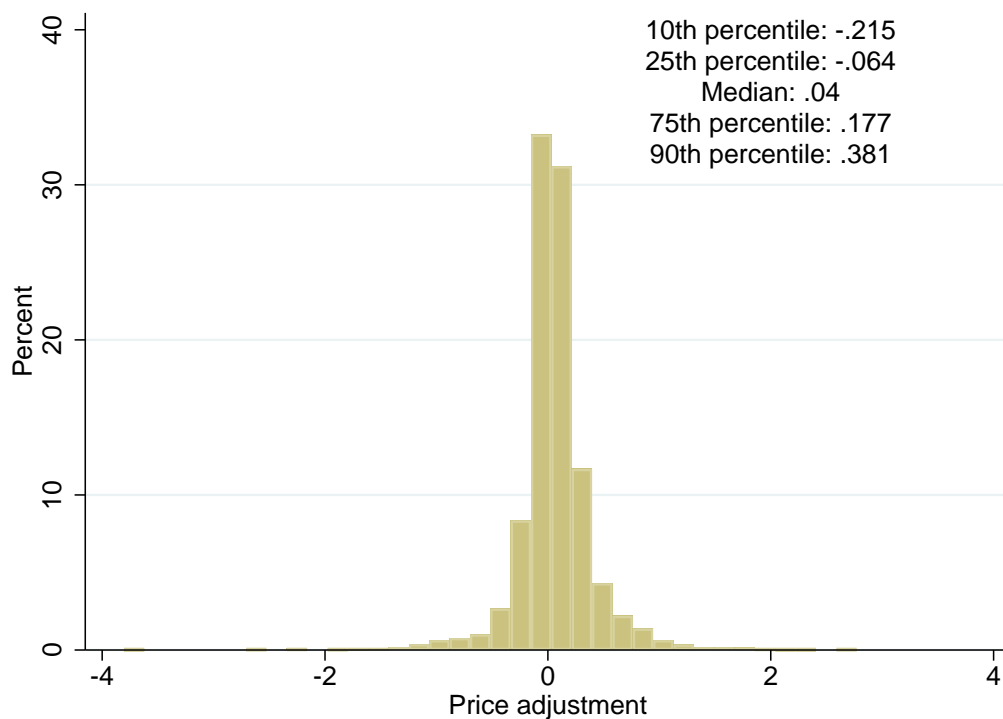

**Note:** Figure shows the distribution of procedure specific price differences. We estimate Equation (2) on the sample of procedures that we observe both under fee-for-service (FFS) Medicaid and Medicaid managed care, allowing the price difference to vary by procedure. We then plot the distribution of the estimated price differences. For more details, see Section 7. ( $N = 6,053$  unique procedure codes.)

Appendix Table H1: Price Adjustment Coefficient

|                       | (1)<br>Log<br>Medicaid<br>Payment |
|-----------------------|-----------------------------------|
| Medicaid Managed Care | .085<br>(.0002)                   |

**Note:** Table shows the estimated difference in log Medicaid payments between Medicaid managed care and fee-for-service Medicaid. The results are from estimating Equation (2). For more details, see Section 7. ( $N = 94,472,521$  claims.)

Appendix Table H2: Price-Adjusted Outpatient Spending Outcomes

|                                     | (1)            | (2)            | (3)                  | (4)                  |
|-------------------------------------|----------------|----------------|----------------------|----------------------|
|                                     | Spending       | Spending       | Adjusted<br>Spending | Adjusted<br>Spending |
| Treatment $\times$ Post             | 366<br>(45)    |                | 265<br>(42.8)        |                      |
| Treatment $\times$ Post (2007-2008) |                | 200<br>(36.7)  |                      | 123<br>(35.9)        |
| Treatment $\times$ Post (2009-2010) |                | 501<br>(62.9)  |                      | 374<br>(60.2)        |
| IV Coefficient                      | 489<br>(54.3)  | 480<br>(57.5)  | 354<br>(53.3)        | 343<br>(56.9)        |
| Baseline Mean                       | 1,551          | 1,551          | 1,549                | 1,549                |
| Percent Change                      | .316<br>(.035) | .309<br>(.037) | .229<br>(.034)       | .221<br>(.037)       |
| Individual Fixed Effects            | X              | X              | X                    | X                    |

**Note:** Table shows reduced form and instrumental variable estimates for price-adjusted outpatient spending outcomes. For each outcome, the first column shows estimates of control-treatment differences from estimating the pooled version of the reduced form specification in Equation (1) and estimates of the impact of Medicaid managed care from estimating our instrumental variable specification, pooling over the entire post-period. The second column shows reduced form and instrumental variable estimates, when the post-period is broken into two separate periods, 2007-2008 and 2009-2010. In the second and fourth columns we estimate the IV coefficient using the two separate treatment  $\times$  post interaction terms as instruments. We control for service area by quarter fixed effects. Standard errors are clustered at the county level. For more details, see Section 4. ( $N = 643,751$  beneficiary-quarters.)

## References

- Chandra, Amitabh, Jonathan Gruber, and Robin McKnight.** 2010. "Patient Cost-Sharing and Hospitalization Offsets in the Elderly." *American Economic Review*, 100(1): 193–213.
- Dranove, David, Christopher Ody, and Amanda Starc.** 2021. "A Dose of Managed Care: Controlling Drug Spending in Medicaid." *American Economic Journal: Applied Economics*, 13(1): 170–197.
- Duggan, Mark, Melissa S. Kearney, and Stephanie Rennane.** 2015. "The Supplemental Security Income Program." *Economics of Means-Tested Transfer Programs in the United States* Vol. 2, 1–58. University of Chicago Press.
- Kaiser Family Foundation.** 2014a. "Medicaid Spending by Enrollment Group." <https://www.kff.org/medicaid/state-indicator/medicaid-spending-by-enrollment-group/>.
- Kaiser Family Foundation.** 2014b. "Medicaid Spending per Enrollee (Full or Partial Benefit)." <https://www.kff.org/medicaid/state-indicator/medicaid-spending-per-enrollee/>.
- Layton, Timothy J., Nicole Maestas, Daniel Prinz, and Boris Vabson.** 2019. "Private vs. Public Provision of Social Insurance: Evidence from Medicaid." National Bureau of Economic Research Disability Research Center Paper NB 18-13.
- Social Security Administration.** 2018. "SSI Annual Statistical Report, 2017." [https://www.ssa.gov/policy/docs/statcomps/ssi\\_asr/2017/ssi\\_asr17.pdf](https://www.ssa.gov/policy/docs/statcomps/ssi_asr/2017/ssi_asr17.pdf).
- Starc, Amanda, and Robert Town.** 2020. "Externalities and Benefit Design in Health Insurance." *Review of Economic Studies*, 87(6): 2827–2858.
